# Supplementary material
Source: publisher figshare collection journal article supplement (https://acs.figshare.com/ndownloader/files/5199712)
Supplement: Supplementary file 1 [file 5199712]

data_01255 

  

_audit_creation_method            SHELXL-97 

_chemical_name_systematic 

; 

 ? 

; 

_chemical_name_common             01255

_chemical_formula_moiety          'C40.25 H52 B Cl N6 Ni O1.25'

_chemical_formula_sum             'C40.25 H52 B Cl N6 Ni O1.25' 

_chemical_formula_weight          744.85 

  

loop_ 

 _atom_type_symbol 

 _atom_type_description 

 _atom_type_scat_dispersion_real 

 _atom_type_scat_dispersion_imag 

 _atom_type_scat_source 

 'C'  'C'   0.0033   0.0016 

 'International Tables Vol C Tables 4.2.6.8 and 6.1.1.4' 

 'H'  'H'   0.0000   0.0000 

 'International Tables Vol C Tables 4.2.6.8 and 6.1.1.4' 

 'N'  'N'   0.0061   0.0033 

 'International Tables Vol C Tables 4.2.6.8 and 6.1.1.4' 

 'Cl'  'Cl'   0.1484   0.1585 

 'International Tables Vol C Tables 4.2.6.8 and 6.1.1.4' 

 'Ni'  'Ni'   0.3393   1.1124 

 'International Tables Vol C Tables 4.2.6.8 and 6.1.1.4' 

 'B'  'B'   0.0013   0.0007 

 'International Tables Vol C Tables 4.2.6.8 and 6.1.1.4' 

 'O'  'O'   0.0106   0.0060 

 'International Tables Vol C Tables 4.2.6.8 and 6.1.1.4' 

  

_symmetry_cell_setting            Triclinic 

_symmetry_space_group_name_H-M    P-1 

  

loop_ 

 _symmetry_equiv_pos_as_xyz 

 'x, y, z' 

 '-x, -y, -z' 

  

_cell_length_a                    11.914(3) 

_cell_length_b                    12.596(4) 

_cell_length_c                    15.042(4) 

_cell_angle_alpha                 83.656(6) 

_cell_angle_beta                  86.246(6) 

_cell_angle_gamma                 64.511(6) 

_cell_volume                      2024.7(10) 

_cell_formula_units_Z             2 

_cell_measurement_temperature     173(2) 

_cell_measurement_reflns_used     2698 

_cell_measurement_theta_min       2.3

_cell_measurement_theta_max       26.9

  

_exptl_crystal_description        block 

_exptl_crystal_colour             green 

_exptl_crystal_size_max           0.35

_exptl_crystal_size_mid           0.30 

_exptl_crystal_size_min           0.20

_exptl_crystal_density_meas       'not measured'

_exptl_crystal_density_diffrn     1.222 

_exptl_crystal_density_method     'not measured' 

_exptl_crystal_F_000              791 

_exptl_absorpt_coefficient_mu     0.584 

_exptl_absorpt_correction_type    multi-scan 

_exptl_absorpt_correction_T_min   0.798 

_exptl_absorpt_correction_T_max   0.900

_exptl_absorpt_process_details    'SADABS 2.03 (Sheldrick, 2000)' 

  

_exptl_special_details 

; 

 ? 

; 

  

_diffrn_ambient_temperature       173(2) 

_diffrn_radiation_wavelength      0.71073 

_diffrn_radiation_type            MoK\a 

_diffrn_radiation_source          'fine-focus sealed tube' 

_diffrn_radiation_monochromator   graphite 

_diffrn_measurement_device_type   'CCD area detector' 

_diffrn_measurement_method        'phi and omega scans' 

_diffrn_detector_area_resol_mean  ? 

_diffrn_standards_number          ? 

_diffrn_standards_interval_count  ? 

_diffrn_standards_interval_time   ? 

_diffrn_standards_decay_%         none

_diffrn_reflns_number             15914

_diffrn_reflns_av_R_equivalents   0.031 

_diffrn_reflns_av_sigmaI/netI     0.0505 

_diffrn_reflns_limit_h_min        -15 

_diffrn_reflns_limit_h_max        15 

_diffrn_reflns_limit_k_min        -16 

_diffrn_reflns_limit_k_max        16 

_diffrn_reflns_limit_l_min        0 

_diffrn_reflns_limit_l_max        19 

_diffrn_reflns_theta_min          1.80 

_diffrn_reflns_theta_max          27.53 

_reflns_number_total              8926 

_reflns_number_gt                 6609 

_reflns_threshold_expression      >2sigma(I) 

  

_computing_data_collection        'Bruker SMART' 

_computing_cell_refinement        'Bruker SMART' 

_computing_data_reduction         'Bruker SAINT' 

_computing_structure_solution     SIR92 

_computing_structure_refinement   'SHELXL-97 (Sheldrick, 1997)' 

_computing_molecular_graphics     'Bruker SHELXTL' 

_computing_publication_material   'Bruker SHELXTL' 

  

_refine_special_details 

; 

 Refinement of F^2^ against ALL reflections.  The weighted R-factor wR and 

 goodness of fit S are based on F^2^, conventional R-factors R are based 

 on F, with F set to zero for negative F^2^. The threshold expression of 

 F^2^ > 2sigma(F^2^) is used only for calculating R-factors(gt) etc. and is 

 not relevant to the choice of reflections for refinement.  R-factors based 

 on F^2^ are statistically about twice as large as those based on F, and R- 

 factors based on ALL data will be even larger. 

; 

  

_refine_ls_structure_factor_coef  Fsqd 

_refine_ls_matrix_type            full 

_refine_ls_weighting_scheme       calc 

_refine_ls_weighting_details 

 'calc w=1/[\s^2^(Fo^2^)+(0.0677P)^2^] where P=(Fo^2^+2Fc^2^)/3' 

_atom_sites_solution_primary      'direct methods'

_atom_sites_solution_secondary    'difference Fourier synthesis'

_atom_sites_solution_hydrogens    'placed geometrically

_refine_ls_hydrogen_treatment     'riding model'

_refine_ls_extinction_method      none 

_refine_ls_extinction_coef        ? 

_refine_ls_number_reflns          8926 

_refine_ls_number_parameters      413 

_refine_ls_number_restraints      0 

_refine_ls_R_factor_all           0.0638 

_refine_ls_R_factor_gt            0.0449 

_refine_ls_wR_factor_ref          0.1290 

_refine_ls_wR_factor_gt           0.1193 

_refine_ls_goodness_of_fit_ref    1.089 

_refine_ls_restrained_S_all       1.089 

_refine_ls_shift/su_max           0.001 

_refine_ls_shift/su_mean          0.000 

  

loop_ 

 _atom_site_label 

 _atom_site_type_symbol 

 _atom_site_fract_x 

 _atom_site_fract_y 

 _atom_site_fract_z 

 _atom_site_U_iso_or_equiv 

 _atom_site_adp_type 

 _atom_site_occupancy 

 _atom_site_symmetry_multiplicity 

 _atom_site_calc_flag 

 _atom_site_refinement_flags 

 _atom_site_disorder_assembly 

 _atom_site_disorder_group 

Ni1 Ni 0.88933(2) 0.07958(2) 0.417979(17) 0.02932(10) Uani 1 1 d . . . 

Cl1 Cl 0.98774(5) 0.12136(5) 0.53106(3) 0.03472(14) Uani 1 1 d . . . 

B1 B 0.7427(2) 0.2095(2) 0.24715(16) 0.0317(5) Uani 1 1 d . . . 

H1 H 0.6968(19) 0.2561(18) 0.1900(15) 0.030(6) Uiso 1 1 d . . . 

N1 N 0.96602(15) 0.10880(15) 0.29821(11) 0.0298(4) Uani 1 1 d . . . 

N2 N 0.88334(16) 0.17601(15) 0.23298(11) 0.0319(4) Uani 1 1 d . . . 

C3 C 0.9452(2) 0.1996(2) 0.16173(15) 0.0381(5) Uani 1 1 d . . . 

H3A H 0.9088 0.2447 0.1077 0.046 Uiso 1 1 calc R . . 

C4 C 1.0697(2) 0.1479(2) 0.17968(15) 0.0395(6) Uani 1 1 d . . . 

H4A H 1.1356 0.1505 0.1418 0.047 Uiso 1 1 calc R . . 

C5 C 1.07884(19) 0.09043(19) 0.26574(14) 0.0316(5) Uani 1 1 d . . . 

C6 C 1.19423(19) 0.0137(2) 0.31675(14) 0.0324(5) Uani 1 1 d . . . 

C7 C 1.2506(2) 0.0620(2) 0.36660(15) 0.0374(5) Uani 1 1 d . . . 

C8 C 1.3593(2) -0.0134(2) 0.41129(17) 0.0476(6) Uani 1 1 d . . . 

H8A H 1.3982 0.0189 0.4465 0.057 Uiso 1 1 calc R . . 

C9 C 1.4120(2) -0.1343(2) 0.40545(18) 0.0514(7) Uani 1 1 d . . . 

C10 C 1.3548(2) -0.1798(2) 0.35477(18) 0.0479(7) Uani 1 1 d . . . 

H10A H 1.3907 -0.2626 0.3506 0.058 Uiso 1 1 calc R . . 

C11 C 1.2457(2) -0.1087(2) 0.30907(15) 0.0390(5) Uani 1 1 d . . . 

C12 C 1.1966(2) 0.1932(2) 0.37542(18) 0.0494(6) Uani 1 1 d . . . 

H12A H 1.2600 0.2129 0.3979 0.074 Uiso 0.50 1 calc PR . . 

H12B H 1.1253 0.2153 0.4173 0.074 Uiso 0.50 1 calc PR . . 

H12C H 1.1694 0.2366 0.3168 0.074 Uiso 0.50 1 calc PR . . 

H12D H 1.1098 0.2303 0.3567 0.074 Uiso 0.50 1 calc PR . . 

H12E H 1.2445 0.2279 0.3374 0.074 Uiso 0.50 1 calc PR . . 

H12F H 1.2004 0.2066 0.4379 0.074 Uiso 0.50 1 calc PR . . 

C13 C 1.5286(3) -0.2140(3) 0.4567(3) 0.0863(12) Uani 1 1 d . . . 

H13A H 1.5533 -0.2961 0.4449 0.130 Uiso 1 1 calc R . . 

H13B H 1.5120 -0.2064 0.5209 0.130 Uiso 1 1 calc R . . 

H13C H 1.5958 -0.1910 0.4374 0.130 Uiso 1 1 calc R . . 

C14 C 1.1852(3) -0.1626(2) 0.25524(18) 0.0533(7) Uani 1 1 d . . . 

H14A H 1.2349 -0.2483 0.2583 0.080 Uiso 1 1 calc R . . 

H14B H 1.1799 -0.1293 0.1928 0.080 Uiso 1 1 calc R . . 

H14C H 1.1014 -0.1454 0.2795 0.080 Uiso 1 1 calc R . . 

N21 N 0.77460(17) 0.03290(16) 0.35432(12) 0.0355(4) Uani 1 1 d . . . 

N22 N 0.72810(16) 0.09498(16) 0.27418(11) 0.0312(4) Uani 1 1 d . . . 

C23 C 0.6787(2) 0.0372(2) 0.23076(15) 0.0364(5) Uani 1 1 d . . . 

C24 C 0.6898(2) -0.0624(2) 0.28655(17) 0.0489(7) Uani 1 1 d . . . 

H24A H 0.6611 -0.1192 0.2756 0.059 Uiso 1 1 calc R . . 

C25 C 0.7513(2) -0.0617(2) 0.36130(16) 0.0448(6) Uani 1 1 d . . . 

H25A H 0.7737 -0.1205 0.4105 0.054 Uiso 1 1 calc R . . 

C26 C 0.6321(2) 0.0741(2) 0.13775(15) 0.0345(5) Uani 1 1 d . . . 

C27 C 0.7161(2) 0.0348(2) 0.06610(16) 0.0414(6) Uani 1 1 d . . . 

C28 C 0.6715(2) 0.0606(2) -0.02034(16) 0.0452(6) Uani 1 1 d . . . 

H28A H 0.7287 0.0341 -0.0689 0.054 Uiso 1 1 calc R . . 

C29 C 0.5463(2) 0.1236(2) -0.03801(15) 0.0409(6) Uani 1 1 d . . . 

C30 C 0.4653(2) 0.1624(2) 0.03394(16) 0.0402(6) Uani 1 1 d . . . 

H30A H 0.3789 0.2061 0.0230 0.048 Uiso 1 1 calc R . . 

C31 C 0.5055(2) 0.1397(2) 0.12135(15) 0.0364(5) Uani 1 1 d . . . 

C32 C 0.8542(2) -0.0360(3) 0.0823(2) 0.0643(8) Uani 1 1 d . . . 

H32A H 0.8985 -0.0562 0.0250 0.096 Uiso 1 1 calc R . . 

H32B H 0.8678 -0.1087 0.1204 0.096 Uiso 1 1 calc R . . 

H32C H 0.8854 0.0110 0.1121 0.096 Uiso 1 1 calc R . . 

C33 C 0.4993(3) 0.1465(2) -0.13252(16) 0.0551(7) Uani 1 1 d . . . 

H33A H 0.4088 0.1924 -0.1320 0.083 Uiso 1 1 calc R . . 

H33B H 0.5206 0.0711 -0.1570 0.083 Uiso 1 1 calc R . . 

H33C H 0.5381 0.1910 -0.1698 0.083 Uiso 1 1 calc R . . 

C34 C 0.4126(2) 0.1832(3) 0.19656(17) 0.0528(7) Uani 1 1 d . . . 

H34A H 0.3289 0.2263 0.1722 0.079 Uiso 1 1 calc R . . 

H34B H 0.4325 0.2359 0.2292 0.079 Uiso 1 1 calc R . . 

H34C H 0.4157 0.1158 0.2374 0.079 Uiso 1 1 calc R . . 

N41 N 0.75854(16) 0.25035(16) 0.40392(11) 0.0337(4) Uani 1 1 d . . . 

N42 N 0.69661(15) 0.28976(15) 0.32537(11) 0.0309(4) Uani 1 1 d . . . 

C43 C 0.6105(2) 0.40290(19) 0.32888(14) 0.0336(5) Uani 1 1 d . . . 

C44 C 0.6177(2) 0.4360(2) 0.41171(15) 0.0415(6) Uani 1 1 d . . . 

H44A H 0.5689 0.5102 0.4342 0.050 Uiso 1 1 calc R . . 

C45 C 0.7111(2) 0.3385(2) 0.45552(15) 0.0375(5) Uani 1 1 d . . . 

H45A H 0.7373 0.3354 0.5144 0.045 Uiso 1 1 calc R . . 

C46 C 0.5264(2) 0.46905(19) 0.25297(14) 0.0347(5) Uani 1 1 d . . . 

C47 C 0.5689(2) 0.5204(2) 0.17903(16) 0.0390(5) Uani 1 1 d . . . 

C48 C 0.4887(2) 0.5796(2) 0.10766(16) 0.0424(6) Uani 1 1 d . . . 

H48A H 0.5172 0.6147 0.0575 0.051 Uiso 1 1 calc R . . 

C49 C 0.3689(2) 0.5879(2) 0.10875(16) 0.0431(6) Uani 1 1 d . . . 

C50 C 0.3292(2) 0.5376(2) 0.18224(16) 0.0428(6) Uani 1 1 d . . . 

H50A H 0.2471 0.5431 0.1834 0.051 Uiso 1 1 calc R . . 

C51 C 0.4051(2) 0.47851(19) 0.25567(15) 0.0364(5) Uani 1 1 d . . . 

C52 C 0.6965(2) 0.5164(2) 0.17727(19) 0.0525(7) Uani 1 1 d . . . 

H52A H 0.7048 0.5684 0.1264 0.079 Uiso 0.50 1 calc PR . . 

H52B H 0.7587 0.4353 0.1713 0.079 Uiso 0.50 1 calc PR . . 

H52C H 0.7096 0.5428 0.2330 0.079 Uiso 0.50 1 calc PR . . 

H52D H 0.7440 0.4626 0.2274 0.079 Uiso 0.50 1 calc PR . . 

H52E H 0.6900 0.5957 0.1825 0.079 Uiso 0.50 1 calc PR . . 

H52F H 0.7391 0.4882 0.1208 0.079 Uiso 0.50 1 calc PR . . 

C53 C 0.2842(3) 0.6547(2) 0.03103(18) 0.0600(8) Uani 1 1 d . . . 

H53A H 0.2032 0.6524 0.0424 0.090 Uiso 1 1 calc R . . 

H53B H 0.3216 0.6178 -0.0241 0.090 Uiso 1 1 calc R . . 

H53C H 0.2729 0.7369 0.0246 0.090 Uiso 1 1 calc R . . 

C54 C 0.3554(2) 0.4285(3) 0.33604(18) 0.0527(7) Uani 1 1 d . . . 

H54A H 0.2643 0.4679 0.3369 0.079 Uiso 0.50 1 calc PR . . 

H54B H 0.3865 0.4414 0.3907 0.079 Uiso 0.50 1 calc PR . . 

H54C H 0.3830 0.3436 0.3328 0.079 Uiso 0.50 1 calc PR . . 

H54D H 0.4249 0.3673 0.3700 0.079 Uiso 0.50 1 calc PR . . 

H54E H 0.3027 0.3939 0.3163 0.079 Uiso 0.50 1 calc PR . . 

H54F H 0.3062 0.4917 0.3741 0.079 Uiso 0.50 1 calc PR . . 

  

loop_ 

 _atom_site_aniso_label 

 _atom_site_aniso_U_11 

 _atom_site_aniso_U_22 

 _atom_site_aniso_U_33 

 _atom_site_aniso_U_23 

 _atom_site_aniso_U_13 

 _atom_site_aniso_U_12 

Ni1 0.03132(16) 0.03201(17) 0.02216(15) 0.00153(11) -0.00508(10) -0.01148(12) 

Cl1 0.0400(3) 0.0325(3) 0.0297(3) 0.0012(2) -0.0112(2) -0.0131(2) 

B1 0.0348(13) 0.0341(13) 0.0241(12) 0.0011(10) -0.0075(9) -0.0126(11) 

N1 0.0319(9) 0.0320(9) 0.0229(9) 0.0011(7) -0.0043(7) -0.0114(8) 

N2 0.0362(10) 0.0332(10) 0.0232(9) 0.0016(7) -0.0043(7) -0.0124(8) 

C3 0.0447(13) 0.0393(13) 0.0252(11) 0.0040(10) -0.0002(9) -0.0149(11) 

C4 0.0396(12) 0.0415(13) 0.0326(12) 0.0008(10) 0.0045(9) -0.0146(11) 

C5 0.0336(11) 0.0302(11) 0.0285(11) -0.0031(9) 0.0011(8) -0.0113(9) 

C6 0.0311(11) 0.0380(12) 0.0265(11) -0.0001(9) 0.0015(8) -0.0141(10) 

C7 0.0374(12) 0.0438(13) 0.0321(12) 0.0006(10) 0.0019(9) -0.0198(11) 

C8 0.0470(14) 0.0631(18) 0.0407(14) 0.0113(13) -0.0126(11) -0.0331(13) 

C9 0.0379(13) 0.0562(17) 0.0551(16) 0.0235(14) -0.0099(11) -0.0208(13) 

C10 0.0390(13) 0.0407(14) 0.0520(15) 0.0107(12) 0.0038(11) -0.0097(11) 

C11 0.0379(12) 0.0401(13) 0.0350(12) -0.0018(10) 0.0034(9) -0.0137(10) 

C12 0.0542(15) 0.0508(15) 0.0492(16) -0.0020(12) 0.0007(12) -0.0287(13) 

C13 0.0562(19) 0.080(2) 0.115(3) 0.051(2) -0.0435(19) -0.0302(17) 

C14 0.0651(18) 0.0403(14) 0.0518(16) -0.0123(12) 0.0016(13) -0.0182(13) 

N21 0.0389(10) 0.0369(10) 0.0301(10) 0.0076(8) -0.0099(8) -0.0170(9) 

N22 0.0331(9) 0.0355(10) 0.0246(9) 0.0010(8) -0.0072(7) -0.0141(8) 

C23 0.0399(12) 0.0402(13) 0.0317(12) 0.0009(10) -0.0089(9) -0.0192(11) 

C24 0.0674(17) 0.0509(15) 0.0422(14) 0.0113(12) -0.0219(12) -0.0390(14) 

C25 0.0565(15) 0.0478(14) 0.0375(13) 0.0130(11) -0.0151(11) -0.0313(13) 

C26 0.0423(12) 0.0373(12) 0.0298(11) -0.0002(10) -0.0067(9) -0.0224(10) 

C27 0.0457(13) 0.0434(14) 0.0395(13) -0.0051(11) -0.0053(10) -0.0224(11) 

C28 0.0619(16) 0.0490(15) 0.0323(13) -0.0089(11) 0.0023(11) -0.0302(13) 

C29 0.0621(16) 0.0401(13) 0.0288(12) 0.0027(10) -0.0098(10) -0.0299(12) 

C30 0.0440(13) 0.0417(13) 0.0378(13) 0.0062(11) -0.0122(10) -0.0217(11) 

C31 0.0441(13) 0.0392(13) 0.0314(12) 0.0022(10) -0.0069(9) -0.0233(11) 

C32 0.0455(15) 0.082(2) 0.0583(18) -0.0208(16) 0.0009(13) -0.0176(15) 

C33 0.090(2) 0.0538(16) 0.0295(13) 0.0020(12) -0.0168(13) -0.0375(16) 

C34 0.0460(14) 0.0651(18) 0.0425(15) -0.0034(13) -0.0015(11) -0.0195(13) 

N41 0.0332(9) 0.0366(10) 0.0249(9) -0.0020(8) -0.0060(7) -0.0084(8) 

N42 0.0302(9) 0.0314(10) 0.0256(9) 0.0011(7) -0.0075(7) -0.0079(8) 

C43 0.0338(11) 0.0307(11) 0.0317(12) 0.0000(9) -0.0026(9) -0.0098(9) 

C44 0.0478(14) 0.0336(12) 0.0327(12) -0.0054(10) -0.0002(10) -0.0071(11) 

C45 0.0410(12) 0.0414(13) 0.0267(11) -0.0073(10) -0.0025(9) -0.0130(11) 

C46 0.0392(12) 0.0271(11) 0.0299(11) -0.0006(9) -0.0047(9) -0.0064(10) 

C47 0.0477(13) 0.0289(11) 0.0374(13) 0.0004(10) -0.0048(10) -0.0138(10) 

C48 0.0579(15) 0.0324(12) 0.0320(12) 0.0043(10) -0.0043(10) -0.0158(11) 

C49 0.0514(15) 0.0322(12) 0.0367(13) 0.0007(10) -0.0145(11) -0.0083(11) 

C50 0.0400(13) 0.0388(13) 0.0421(14) -0.0023(11) -0.0091(10) -0.0089(11) 

C51 0.0386(12) 0.0319(12) 0.0328(12) -0.0021(9) -0.0028(9) -0.0095(10) 

C52 0.0510(15) 0.0509(16) 0.0541(16) 0.0078(13) -0.0013(12) -0.0233(13) 

C53 0.0702(19) 0.0483(16) 0.0466(16) 0.0044(13) -0.0266(14) -0.0098(14) 

C54 0.0459(14) 0.0615(17) 0.0489(16) 0.0031(13) -0.0016(12) -0.0231(13) 

  

_geom_special_details 

; 

 All esds (except the esd in the dihedral angle between two l.s. planes) 

 are estimated using the full covariance matrix.  The cell esds are taken 

 into account individually in the estimation of esds in distances, angles 

 and torsion angles; correlations between esds in cell parameters are only 

 used when they are defined by crystal symmetry.  An approximate (isotropic) 

 treatment of cell esds is used for estimating esds involving l.s. planes. 

; 

  

loop_ 

 _geom_bond_atom_site_label_1 

 _geom_bond_atom_site_label_2 

 _geom_bond_distance 

 _geom_bond_site_symmetry_2 

 _geom_bond_publ_flag 

Ni1 N21 2.029(2) . ? 

Ni1 N1 2.0355(17) . ? 

Ni1 N41 2.0390(18) . ? 

Ni1 Cl1 2.3527(7) . ? 

Ni1 Cl1 2.3804(8) 2_756 ? 

Cl1 Ni1 2.3804(8) 2_756 ? 

B1 N22 1.534(3) . ? 

B1 N2 1.548(3) . ? 

B1 N42 1.552(3) . ? 

N1 C5 1.330(3) . ? 

N1 N2 1.369(2) . ? 

N2 C3 1.340(3) . ? 

C3 C4 1.371(3) . ? 

C4 C5 1.398(3) . ? 

C5 C6 1.498(3) . ? 

C6 C7 1.379(3) . ? 

C6 C11 1.408(3) . ? 

C7 C8 1.395(3) . ? 

C7 C12 1.512(3) . ? 

C8 C9 1.386(4) . ? 

C9 C10 1.369(4) . ? 

C9 C13 1.517(3) . ? 

C10 C11 1.394(3) . ? 

C11 C14 1.502(4) . ? 

N21 C25 1.326(3) . ? 

N21 N22 1.370(2) . ? 

N22 C23 1.351(3) . ? 

C23 C24 1.391(3) . ? 

C23 C26 1.489(3) . ? 

C24 C25 1.385(3) . ? 

C26 C31 1.397(3) . ? 

C26 C27 1.400(3) . ? 

C27 C28 1.388(3) . ? 

C27 C32 1.517(3) . ? 

C28 C29 1.383(3) . ? 

C29 C30 1.384(3) . ? 

C29 C33 1.514(3) . ? 

C30 C31 1.386(3) . ? 

C31 C34 1.502(3) . ? 

N41 C45 1.321(3) . ? 

N41 N42 1.362(2) . ? 

N42 C43 1.356(3) . ? 

C43 C44 1.376(3) . ? 

C43 C46 1.491(3) . ? 

C44 C45 1.386(3) . ? 

C46 C51 1.396(3) . ? 

C46 C47 1.400(3) . ? 

C47 C48 1.402(3) . ? 

C47 C52 1.498(4) . ? 

C48 C49 1.384(4) . ? 

C49 C50 1.372(3) . ? 

C49 C53 1.517(3) . ? 

C50 C51 1.400(3) . ? 

C51 C54 1.506(3) . ? 

  

loop_ 

 _geom_angle_atom_site_label_1 

 _geom_angle_atom_site_label_2 

 _geom_angle_atom_site_label_3 

 _geom_angle 

 _geom_angle_site_symmetry_1 

 _geom_angle_site_symmetry_3 

 _geom_angle_publ_flag 

N21 Ni1 N1 90.08(8) . . ? 

N21 Ni1 N41 88.62(8) . . ? 

N1 Ni1 N41 88.87(7) . . ? 

N21 Ni1 Cl1 161.93(6) . . ? 

N1 Ni1 Cl1 107.99(6) . . ? 

N41 Ni1 Cl1 91.43(6) . . ? 

N21 Ni1 Cl1 90.86(6) . 2_756 ? 

N1 Ni1 Cl1 105.92(5) . 2_756 ? 

N41 Ni1 Cl1 165.20(5) . 2_756 ? 

Cl1 Ni1 Cl1 84.52(3) . 2_756 ? 

Ni1 Cl1 Ni1 95.48(3) . 2_756 ? 

N22 B1 N2 107.57(17) . . ? 

N22 B1 N42 109.37(18) . . ? 

N2 B1 N42 107.20(18) . . ? 

C5 N1 N2 106.86(16) . . ? 

C5 N1 Ni1 137.08(14) . . ? 

N2 N1 Ni1 115.62(13) . . ? 

C3 N2 N1 109.39(17) . . ? 

C3 N2 B1 130.03(18) . . ? 

N1 N2 B1 120.54(17) . . ? 

N2 C3 C4 108.68(19) . . ? 

C3 C4 C5 105.20(19) . . ? 

N1 C5 C4 109.85(19) . . ? 

N1 C5 C6 122.03(18) . . ? 

C4 C5 C6 128.06(19) . . ? 

C7 C6 C11 121.3(2) . . ? 

C7 C6 C5 121.0(2) . . ? 

C11 C6 C5 117.7(2) . . ? 

C6 C7 C8 118.6(2) . . ? 

C6 C7 C12 121.9(2) . . ? 

C8 C7 C12 119.5(2) . . ? 

C9 C8 C7 121.5(3) . . ? 

C10 C9 C8 118.7(2) . . ? 

C10 C9 C13 121.2(3) . . ? 

C8 C9 C13 120.1(3) . . ? 

C9 C10 C11 122.2(2) . . ? 

C10 C11 C6 117.7(2) . . ? 

C10 C11 C14 120.5(2) . . ? 

C6 C11 C14 121.9(2) . . ? 

C25 N21 N22 106.88(18) . . ? 

C25 N21 Ni1 134.20(15) . . ? 

N22 N21 Ni1 117.18(14) . . ? 

C23 N22 N21 109.91(17) . . ? 

C23 N22 B1 131.34(18) . . ? 

N21 N22 B1 118.71(17) . . ? 

N22 C23 C24 106.9(2) . . ? 

N22 C23 C26 123.6(2) . . ? 

C24 C23 C26 129.3(2) . . ? 

C25 C24 C23 106.0(2) . . ? 

N21 C25 C24 110.3(2) . . ? 

C31 C26 C27 119.8(2) . . ? 

C31 C26 C23 121.1(2) . . ? 

C27 C26 C23 119.0(2) . . ? 

C28 C27 C26 119.1(2) . . ? 

C28 C27 C32 120.2(2) . . ? 

C26 C27 C32 120.7(2) . . ? 

C29 C28 C27 122.1(2) . . ? 

C28 C29 C30 117.7(2) . . ? 

C28 C29 C33 121.1(2) . . ? 

C30 C29 C33 121.2(2) . . ? 

C29 C30 C31 122.4(2) . . ? 

C30 C31 C26 119.0(2) . . ? 

C30 C31 C34 119.8(2) . . ? 

C26 C31 C34 121.3(2) . . ? 

C45 N41 N42 106.73(17) . . ? 

C45 N41 Ni1 135.56(15) . . ? 

N42 N41 Ni1 117.66(14) . . ? 

C43 N42 N41 109.75(17) . . ? 

C43 N42 B1 131.49(17) . . ? 

N41 N42 B1 118.32(16) . . ? 

N42 C43 C44 107.31(19) . . ? 

N42 C43 C46 122.0(2) . . ? 

C44 C43 C46 130.7(2) . . ? 

C43 C44 C45 105.7(2) . . ? 

N41 C45 C44 110.6(2) . . ? 

C51 C46 C47 120.1(2) . . ? 

C51 C46 C43 119.5(2) . . ? 

C47 C46 C43 120.3(2) . . ? 

C46 C47 C48 119.1(2) . . ? 

C46 C47 C52 120.7(2) . . ? 

C48 C47 C52 120.2(2) . . ? 

C49 C48 C47 121.4(2) . . ? 

C50 C49 C48 118.4(2) . . ? 

C50 C49 C53 121.8(2) . . ? 

C48 C49 C53 119.8(2) . . ? 

C49 C50 C51 122.5(2) . . ? 

C46 C51 C50 118.5(2) . . ? 

C46 C51 C54 121.2(2) . . ? 

C50 C51 C54 120.4(2) . . ? 

 

loop_ 

 _geom_torsion_atom_site_label_1 

 _geom_torsion_atom_site_label_2 

 _geom_torsion_atom_site_label_3 

 _geom_torsion_atom_site_label_4 

 _geom_torsion 

 _geom_torsion_site_symmetry_1 

 _geom_torsion_site_symmetry_2 

 _geom_torsion_site_symmetry_3 

 _geom_torsion_site_symmetry_4 

 _geom_torsion_publ_flag 

N21 Ni1 Cl1 Ni1 75.79(17) . . . 2_756 ? 

N1 Ni1 Cl1 Ni1 -104.99(5) . . . 2_756 ? 

N41 Ni1 Cl1 Ni1 165.74(5) . . . 2_756 ? 

Cl1 Ni1 Cl1 Ni1 0.0 2_756 . . 2_756 ? 

N21 Ni1 N1 C5 -140.5(2) . . . . ? 

N41 Ni1 N1 C5 130.9(2) . . . . ? 

Cl1 Ni1 N1 C5 39.7(2) . . . . ? 

Cl1 Ni1 N1 C5 -49.6(2) 2_756 . . . ? 

N21 Ni1 N1 N2 48.36(15) . . . . ? 

N41 Ni1 N1 N2 -40.26(15) . . . . ? 

Cl1 Ni1 N1 N2 -131.40(13) . . . . ? 

Cl1 Ni1 N1 N2 139.27(13) 2_756 . . . ? 

C5 N1 N2 C3 -0.7(2) . . . . ? 

Ni1 N1 N2 C3 172.95(15) . . . . ? 

C5 N1 N2 B1 177.34(19) . . . . ? 

Ni1 N1 N2 B1 -9.0(2) . . . . ? 

N22 B1 N2 C3 124.9(2) . . . . ? 

N42 B1 N2 C3 -117.6(2) . . . . ? 

N22 B1 N2 N1 -52.8(2) . . . . ? 

N42 B1 N2 N1 64.8(2) . . . . ? 

N1 N2 C3 C4 0.0(3) . . . . ? 

B1 N2 C3 C4 -177.9(2) . . . . ? 

N2 C3 C4 C5 0.7(3) . . . . ? 

N2 N1 C5 C4 1.2(2) . . . . ? 

Ni1 N1 C5 C4 -170.41(17) . . . . ? 

N2 N1 C5 C6 -176.24(19) . . . . ? 

Ni1 N1 C5 C6 12.1(3) . . . . ? 

C3 C4 C5 N1 -1.2(3) . . . . ? 

C3 C4 C5 C6 176.0(2) . . . . ? 

N1 C5 C6 C7 -97.4(3) . . . . ? 

C4 C5 C6 C7 85.6(3) . . . . ? 

N1 C5 C6 C11 85.1(3) . . . . ? 

C4 C5 C6 C11 -91.9(3) . . . . ? 

C11 C6 C7 C8 -1.3(3) . . . . ? 

C5 C6 C7 C8 -178.7(2) . . . . ? 

C11 C6 C7 C12 179.9(2) . . . . ? 

C5 C6 C7 C12 2.5(3) . . . . ? 

C6 C7 C8 C9 0.9(4) . . . . ? 

C12 C7 C8 C9 179.8(2) . . . . ? 

C7 C8 C9 C10 -0.3(4) . . . . ? 

C7 C8 C9 C13 -178.5(2) . . . . ? 

C8 C9 C10 C11 0.0(4) . . . . ? 

C13 C9 C10 C11 178.2(3) . . . . ? 

C9 C10 C11 C6 -0.3(4) . . . . ? 

C9 C10 C11 C14 -179.2(2) . . . . ? 

C7 C6 C11 C10 1.0(3) . . . . ? 

C5 C6 C11 C10 178.44(19) . . . . ? 

C7 C6 C11 C14 179.8(2) . . . . ? 

C5 C6 C11 C14 -2.7(3) . . . . ? 

N1 Ni1 N21 C25 125.0(2) . . . . ? 

N41 Ni1 N21 C25 -146.1(2) . . . . ? 

Cl1 Ni1 N21 C25 -55.7(3) . . . . ? 

Cl1 Ni1 N21 C25 19.1(2) 2_756 . . . ? 

N1 Ni1 N21 N22 -37.69(15) . . . . ? 

N41 Ni1 N21 N22 51.17(15) . . . . ? 

Cl1 Ni1 N21 N22 141.56(14) . . . . ? 

Cl1 Ni1 N21 N22 -143.62(15) 2_756 . . . ? 

C25 N21 N22 C23 -1.4(2) . . . . ? 

Ni1 N21 N22 C23 165.70(14) . . . . ? 

C25 N21 N22 B1 -179.4(2) . . . . ? 

Ni1 N21 N22 B1 -12.3(2) . . . . ? 

N2 B1 N22 C23 -111.8(2) . . . . ? 

N42 B1 N22 C23 132.0(2) . . . . ? 

N2 B1 N22 N21 65.7(2) . . . . ? 

N42 B1 N22 N21 -50.5(2) . . . . ? 

N21 N22 C23 C24 2.3(3) . . . . ? 

B1 N22 C23 C24 180.0(2) . . . . ? 

N21 N22 C23 C26 -173.4(2) . . . . ? 

B1 N22 C23 C26 4.3(4) . . . . ? 

N22 C23 C24 C25 -2.3(3) . . . . ? 

C26 C23 C24 C25 173.1(2) . . . . ? 

N22 N21 C25 C24 -0.1(3) . . . . ? 

Ni1 N21 C25 C24 -164.01(18) . . . . ? 

C23 C24 C25 N21 1.5(3) . . . . ? 

N22 C23 C26 C31 -98.8(3) . . . . ? 

C24 C23 C26 C31 86.5(3) . . . . ? 

N22 C23 C26 C27 85.9(3) . . . . ? 

C24 C23 C26 C27 -88.9(3) . . . . ? 

C31 C26 C27 C28 -0.9(4) . . . . ? 

C23 C26 C27 C28 174.6(2) . . . . ? 

C31 C26 C27 C32 179.7(2) . . . . ? 

C23 C26 C27 C32 -4.9(4) . . . . ? 

C26 C27 C28 C29 -0.3(4) . . . . ? 

C32 C27 C28 C29 179.2(2) . . . . ? 

C27 C28 C29 C30 0.9(4) . . . . ? 

C27 C28 C29 C33 -177.6(2) . . . . ? 

C28 C29 C30 C31 -0.3(4) . . . . ? 

C33 C29 C30 C31 178.2(2) . . . . ? 

C29 C30 C31 C26 -0.8(4) . . . . ? 

C29 C30 C31 C34 -179.3(2) . . . . ? 

C27 C26 C31 C30 1.4(3) . . . . ? 

C23 C26 C31 C30 -173.9(2) . . . . ? 

C27 C26 C31 C34 179.9(2) . . . . ? 

C23 C26 C31 C34 4.6(4) . . . . ? 

N21 Ni1 N41 C45 137.3(2) . . . . ? 

N1 Ni1 N41 C45 -132.6(2) . . . . ? 

Cl1 Ni1 N41 C45 -24.6(2) . . . . ? 

Cl1 Ni1 N41 C45 49.2(4) 2_756 . . . ? 

N21 Ni1 N41 N42 -39.53(16) . . . . ? 

N1 Ni1 N41 N42 50.58(16) . . . . ? 

Cl1 Ni1 N41 N42 158.55(15) . . . . ? 

Cl1 Ni1 N41 N42 -127.66(19) 2_756 . . . ? 

C45 N41 N42 C43 0.0(2) . . . . ? 

Ni1 N41 N42 C43 177.67(14) . . . . ? 

C45 N41 N42 B1 173.22(19) . . . . ? 

Ni1 N41 N42 B1 -9.1(2) . . . . ? 

N22 B1 N42 C43 -124.9(2) . . . . ? 

N2 B1 N42 C43 118.8(2) . . . . ? 

N22 B1 N42 N41 63.6(2) . . . . ? 

N2 B1 N42 N41 -52.7(2) . . . . ? 

N41 N42 C43 C44 -0.1(3) . . . . ? 

B1 N42 C43 C44 -172.2(2) . . . . ? 

N41 N42 C43 C46 -178.8(2) . . . . ? 

B1 N42 C43 C46 9.1(4) . . . . ? 

N42 C43 C44 C45 0.2(3) . . . . ? 

C46 C43 C44 C45 178.7(2) . . . . ? 

N42 N41 C45 C44 0.2(3) . . . . ? 

Ni1 N41 C45 C44 -176.91(17) . . . . ? 

C43 C44 C45 N41 -0.3(3) . . . . ? 

N42 C43 C46 C51 99.1(3) . . . . ? 

C44 C43 C46 C51 -79.2(3) . . . . ? 

N42 C43 C46 C47 -80.2(3) . . . . ? 

C44 C43 C46 C47 101.5(3) . . . . ? 

C51 C46 C47 C48 -0.9(3) . . . . ? 

C43 C46 C47 C48 178.5(2) . . . . ? 

C51 C46 C47 C52 176.8(2) . . . . ? 

C43 C46 C47 C52 -3.9(3) . . . . ? 

C46 C47 C48 C49 -0.2(4) . . . . ? 

C52 C47 C48 C49 -177.9(2) . . . . ? 

C47 C48 C49 C50 0.7(4) . . . . ? 

C47 C48 C49 C53 178.8(2) . . . . ? 

C48 C49 C50 C51 -0.1(4) . . . . ? 

C53 C49 C50 C51 -178.2(2) . . . . ? 

C47 C46 C51 C50 1.5(3) . . . . ? 

C43 C46 C51 C50 -177.9(2) . . . . ? 

C47 C46 C51 C54 -177.4(2) . . . . ? 

C43 C46 C51 C54 3.2(3) . . . . ? 

C49 C50 C51 C46 -1.0(4) . . . . ? 

C49 C50 C51 C54 177.9(2) . . . . ? 

 

_diffrn_measured_fraction_theta_max    0.957 

_diffrn_reflns_theta_full              27.50 

_diffrn_measured_fraction_theta_full   0.959 

_refine_diff_density_max    0.463 

_refine_diff_density_min   -0.400 

_refine_diff_density_rms    0.059 


#===END

  

data_01256 

  

_audit_creation_method            SHELXL-97 

_chemical_name_systematic 

; 

 ? 

; 

_chemical_name_common             01256

_chemical_formula_moiety          'C36 H40 B Cl N6 Ni'

_chemical_formula_sum             'C36 H40 B Cl N6 Ni' 

_chemical_formula_weight          661.71 

  

loop_ 

 _atom_type_symbol 

 _atom_type_description 

 _atom_type_scat_dispersion_real 

 _atom_type_scat_dispersion_imag 

 _atom_type_scat_source 

 'C'  'C'   0.0033   0.0016 

 'International Tables Vol C Tables 4.2.6.8 and 6.1.1.4' 

 'H'  'H'   0.0000   0.0000 

 'International Tables Vol C Tables 4.2.6.8 and 6.1.1.4' 

 'N'  'N'   0.0061   0.0033 

 'International Tables Vol C Tables 4.2.6.8 and 6.1.1.4' 

 'Cl'  'Cl'   0.1484   0.1585 

 'International Tables Vol C Tables 4.2.6.8 and 6.1.1.4' 

 'Ni'  'Ni'   0.3393   1.1124 

 'International Tables Vol C Tables 4.2.6.8 and 6.1.1.4' 

 'B'  'B'   0.0013   0.0007 

 'International Tables Vol C Tables 4.2.6.8 and 6.1.1.4' 

  

_symmetry_cell_setting            Triclinic 

_symmetry_space_group_name_H-M    P1 

  

loop_ 

 _symmetry_equiv_pos_as_xyz 

 'x, y, z' 

  

_cell_length_a                    9.1756(10) 

_cell_length_b                    10.9562(12) 

_cell_length_c                    17.497(2) 

_cell_angle_alpha                 102.601(2) 

_cell_angle_beta                  97.437(2) 

_cell_angle_gamma                 95.017(2) 

_cell_volume                      1690.0(3) 

_cell_formula_units_Z             2 

_cell_measurement_temperature     173(2) 

_cell_measurement_reflns_used     3250 

_cell_measurement_theta_min       1.9

_cell_measurement_theta_max       27.1

  

_exptl_crystal_description        block 

_exptl_crystal_colour             pink 

_exptl_crystal_size_max           0.38

_exptl_crystal_size_mid           0.30

_exptl_crystal_size_min           0.15

_exptl_crystal_density_meas       'not measured'

_exptl_crystal_density_diffrn     1.300 

_exptl_crystal_density_method     'not measured' 

_exptl_crystal_F_000              696 

_exptl_absorpt_coefficient_mu     0.688 

_exptl_absorpt_correction_type    multi-scan 

_exptl_absorpt_correction_T_min   0.747

_exptl_absorpt_correction_T_max   0.900

_exptl_absorpt_process_details    'SADABS 2.03 (Sheldrick, 2000)'

  

_exptl_special_details 

; 

 ? 

; 

  

_diffrn_ambient_temperature       173(2) 

_diffrn_radiation_wavelength      0.71073 

_diffrn_radiation_type            MoK\a 

_diffrn_radiation_source          'fine-focus sealed tube' 

_diffrn_radiation_monochromator   graphite 

_diffrn_measurement_device_type   'CCD area detector' 

_diffrn_measurement_method        'phi and omega scans' 

_diffrn_detector_area_resol_mean  ? 

_diffrn_standards_number          ? 

_diffrn_standards_interval_count  ? 

_diffrn_standards_interval_time   ? 

_diffrn_standards_decay_%         none

_diffrn_reflns_number             13703 

_diffrn_reflns_av_R_equivalents   0.0167 

_diffrn_reflns_av_sigmaI/netI     0.0488 

_diffrn_reflns_limit_h_min        -11 

_diffrn_reflns_limit_h_max        11 

_diffrn_reflns_limit_k_min        -13 

_diffrn_reflns_limit_k_max        13 

_diffrn_reflns_limit_l_min        -21 

_diffrn_reflns_limit_l_max        21 

_diffrn_reflns_theta_min          1.92 

_diffrn_reflns_theta_max          26.00 

_reflns_number_total              12037 

_reflns_number_gt                 10795 

_reflns_threshold_expression      >2sigma(I) 

  

_computing_data_collection        'Bruker SMART' 

_computing_cell_refinement        'Bruker SMART' 

_computing_data_reduction         'Bruker SAINT' 

_computing_structure_solution     SIR92 

_computing_structure_refinement   'SHELXL-97 (Sheldrick, 1997)' 

_computing_molecular_graphics     'Bruker SHELXTL' 

_computing_publication_material   'Bruker SHELXTL' 

  

_refine_special_details 

; 

 Refinement of F^2^ against ALL reflections.  The weighted R-factor wR and 

 goodness of fit S are based on F^2^, conventional R-factors R are based 

 on F, with F set to zero for negative F^2^. The threshold expression of 

 F^2^ > 2sigma(F^2^) is used only for calculating R-factors(gt) etc. and is 

 not relevant to the choice of reflections for refinement.  R-factors based 

 on F^2^ are statistically about twice as large as those based on F, and R- 

 factors based on ALL data will be even larger. 

; 

  

_refine_ls_structure_factor_coef  Fsqd 

_refine_ls_matrix_type            full 

_refine_ls_weighting_scheme       calc 

_refine_ls_weighting_details 

 'calc w=1/[\s^2^(Fo^2^)+(0.0693P)^2^+0.0800P] where P=(Fo^2^+2Fc^2^)/3' 

_atom_sites_solution_primary      'direct methods'

_atom_sites_solution_secondary    'difference Fourier synthesis'

_atom_sites_solution_hydrogens    'placed geometrically

_refine_ls_hydrogen_treatment     'riding model'

_refine_ls_extinction_method      none 

_refine_ls_extinction_coef        ? 

_refine_ls_abs_structure_details 

 'Flack H D (1983), Acta Cryst. A39, 876-881' 

_refine_ls_abs_structure_Flack    -0.028(10) 

_refine_ls_number_reflns          12037 

_refine_ls_number_parameters      819 

_refine_ls_number_restraints      3 

_refine_ls_R_factor_all           0.0498 

_refine_ls_R_factor_gt            0.0427 

_refine_ls_wR_factor_ref          0.1125 

_refine_ls_wR_factor_gt           0.1068 

_refine_ls_goodness_of_fit_ref    1.041 

_refine_ls_restrained_S_all       1.041 

_refine_ls_shift/su_max           0.000 

_refine_ls_shift/su_mean          0.000 

  

loop_ 

 _atom_site_label 

 _atom_site_type_symbol 

 _atom_site_fract_x 

 _atom_site_fract_y 

 _atom_site_fract_z 

 _atom_site_U_iso_or_equiv 

 _atom_site_adp_type 

 _atom_site_occupancy 

 _atom_site_symmetry_multiplicity 

 _atom_site_calc_flag 

 _atom_site_refinement_flags 

 _atom_site_disorder_assembly 

 _atom_site_disorder_group 

Ni1 Ni -0.50719(4) 0.21847(4) -0.13078(3) 0.02269(11) Uani 1 1 d . . . 

Cl1 Cl -0.32073(11) 0.24688(12) -0.19015(6) 0.0461(3) Uani 1 1 d . . . 

B1 B -0.7471(5) 0.1957(4) -0.0300(3) 0.0263(9) Uani 1 1 d . . . 

H1 H -0.839(4) 0.184(3) 0.006(2) 0.025(10) Uiso 1 1 d . . . 

N1 N -0.5044(3) 0.3271(3) -0.02233(18) 0.0242(6) Uani 1 1 d . . . 

N2 N -0.6242(3) 0.3042(3) 0.01358(19) 0.0253(7) Uani 1 1 d . . . 

C3 C -0.6078(4) 0.3820(4) 0.0853(2) 0.0267(8) Uani 1 1 d . . . 

H3A H -0.6758 0.3842 0.1220 0.032 Uiso 1 1 calc R . . 

C4 C -0.4749(4) 0.4592(3) 0.0970(2) 0.0278(8) Uani 1 1 d . . . 

H4A H -0.4346 0.5238 0.1424 0.033 Uiso 1 1 calc R . . 

C5 C -0.4126(4) 0.4219(3) 0.0280(2) 0.0241(7) Uani 1 1 d . . . 

C6 C -0.2716(4) 0.4714(3) 0.0065(2) 0.0251(7) Uani 1 1 d . . . 

C7 C -0.2733(5) 0.5432(4) -0.0501(2) 0.0323(9) Uani 1 1 d . . . 

C8 C -0.1411(5) 0.5910(4) -0.0681(3) 0.0413(11) Uani 1 1 d . . . 

H8A H -0.1423 0.6408 -0.1063 0.050 Uiso 1 1 calc R . . 

C9 C -0.0055(5) 0.5677(5) -0.0311(3) 0.0457(11) Uani 1 1 d . . . 

C10 C -0.0057(4) 0.4973(4) 0.0249(2) 0.0350(9) Uani 1 1 d . . . 

H10A H 0.0861 0.4809 0.0503 0.042 Uiso 1 1 calc R . . 

C11 C -0.1367(4) 0.4491(3) 0.0457(2) 0.0276(8) Uani 1 1 d . . . 

C12 C -0.4169(5) 0.5687(4) -0.0936(3) 0.0448(11) Uani 1 1 d . . . 

H12A H -0.5006 0.5294 -0.0743 0.067 Uiso 1 1 calc R . . 

H12B H -0.4225 0.5334 -0.1505 0.067 Uiso 1 1 calc R . . 

H12C H -0.4208 0.6598 -0.0840 0.067 Uiso 1 1 calc R . . 

C13 C 0.1399(6) 0.6180(6) -0.0521(4) 0.0726(18) Uani 1 1 d . . . 

H13A H 0.2223 0.5912 -0.0208 0.109 Uiso 1 1 calc R . . 

H13B H 0.1489 0.7102 -0.0405 0.109 Uiso 1 1 calc R . . 

H13C H 0.1422 0.5850 -0.1087 0.109 Uiso 1 1 calc R . . 

C14 C -0.1293(5) 0.3746(4) 0.1082(2) 0.0372(9) Uani 1 1 d . . . 

H14A H -0.2299 0.3479 0.1162 0.056 Uiso 1 1 calc R . . 

H14B H -0.0743 0.4270 0.1580 0.056 Uiso 1 1 calc R . . 

H14C H -0.0790 0.3002 0.0913 0.056 Uiso 1 1 calc R . . 

N21 N -0.5620(3) 0.0654(3) -0.09175(17) 0.0242(6) Uani 1 1 d . . . 

N22 N -0.6742(3) 0.0731(3) -0.04732(18) 0.0260(6) Uani 1 1 d . . . 

C23 C -0.6999(4) -0.0357(4) -0.0255(2) 0.0297(8) Uani 1 1 d . . . 

H23A H -0.7723 -0.0541 0.0059 0.036 Uiso 1 1 calc R . . 

C24 C -0.6036(4) -0.1166(4) -0.0563(2) 0.0292(8) Uani 1 1 d . . . 

H24A H -0.5975 -0.2004 -0.0507 0.035 Uiso 1 1 calc R . . 

C25 C -0.5182(4) -0.0508(3) -0.0967(2) 0.0248(8) Uani 1 1 d . . . 

C26 C -0.3906(4) -0.0880(3) -0.1373(2) 0.0257(8) Uani 1 1 d . . . 

C27 C -0.2469(4) -0.0345(3) -0.1024(2) 0.0292(8) Uani 1 1 d . . . 

C28 C -0.1278(4) -0.0736(4) -0.1396(3) 0.0351(9) Uani 1 1 d . . . 

H28A H -0.0304 -0.0365 -0.1160 0.042 Uiso 1 1 calc R . . 

C29 C -0.1474(5) -0.1642(4) -0.2091(3) 0.0383(10) Uani 1 1 d . . . 

C30 C -0.2904(5) -0.2170(4) -0.2434(3) 0.0355(10) Uani 1 1 d . . . 

H30A H -0.3055 -0.2790 -0.2918 0.043 Uiso 1 1 calc R . . 

C31 C -0.4123(4) -0.1805(3) -0.2079(2) 0.0308(8) Uani 1 1 d . . . 

C32 C -0.2176(4) 0.0645(4) -0.0260(2) 0.0372(9) Uani 1 1 d . . . 

H32A H -0.3116 0.0821 -0.0076 0.056 Uiso 1 1 calc R . . 

H32B H -0.1670 0.1418 -0.0347 0.056 Uiso 1 1 calc R . . 

H32C H -0.1550 0.0342 0.0140 0.056 Uiso 1 1 calc R . . 

C33 C -0.0153(6) -0.2039(5) -0.2488(3) 0.0590(14) Uani 1 1 d . . . 

H33A H 0.0761 -0.1568 -0.2167 0.089 Uiso 1 1 calc R . . 

H33B H -0.0256 -0.1860 -0.3016 0.089 Uiso 1 1 calc R . . 

H33C H -0.0115 -0.2943 -0.2537 0.089 Uiso 1 1 calc R . . 

C34 C -0.5660(5) -0.2444(4) -0.2460(3) 0.0413(10) Uani 1 1 d . . . 

H34A H -0.5591 -0.3064 -0.2947 0.062 Uiso 1 1 calc R . . 

H34B H -0.6282 -0.1811 -0.2588 0.062 Uiso 1 1 calc R . . 

H34C H -0.6099 -0.2869 -0.2092 0.062 Uiso 1 1 calc R . . 

N41 N -0.7189(3) 0.2346(3) -0.16454(18) 0.0250(7) Uani 1 1 d . . . 

N42 N -0.8100(3) 0.2246(3) -0.10873(19) 0.0268(7) Uani 1 1 d . . . 

C43 C -0.9481(4) 0.2375(4) -0.1382(3) 0.0329(9) Uani 1 1 d . . . 

H43A H -1.0315 0.2344 -0.1113 0.040 Uiso 1 1 calc R . . 

C44 C -0.9503(4) 0.2558(4) -0.2125(2) 0.0358(9) Uani 1 1 d . . . 

H44A H -1.0338 0.2682 -0.2469 0.043 Uiso 1 1 calc R . . 

C45 C -0.8049(4) 0.2527(3) -0.2282(2) 0.0264(8) Uani 1 1 d . . . 

C46 C -0.7497(4) 0.2653(3) -0.3026(2) 0.0262(8) Uani 1 1 d . . . 

C47 C -0.7763(4) 0.3716(4) -0.3332(2) 0.0303(8) Uani 1 1 d . . . 

C48 C -0.7336(5) 0.3781(4) -0.4052(2) 0.0349(9) Uani 1 1 d . . . 

H48A H -0.7519 0.4498 -0.4256 0.042 Uiso 1 1 calc R . . 

C49 C -0.6655(4) 0.2852(4) -0.4489(2) 0.0337(9) Uani 1 1 d . . . 

C50 C -0.6377(4) 0.1812(4) -0.4180(2) 0.0297(8) Uani 1 1 d . . . 

H50A H -0.5879 0.1176 -0.4462 0.036 Uiso 1 1 calc R . . 

C51 C -0.6815(4) 0.1684(3) -0.3465(2) 0.0265(8) Uani 1 1 d . . . 

C52 C -0.8512(5) 0.4767(4) -0.2905(3) 0.0454(11) Uani 1 1 d . . . 

H52A H -0.8589 0.5413 -0.3212 0.068 Uiso 1 1 calc R . . 

H52B H -0.7931 0.5138 -0.2382 0.068 Uiso 1 1 calc R . . 

H52C H -0.9505 0.4435 -0.2842 0.068 Uiso 1 1 calc R . . 

C53 C -0.6254(6) 0.2935(5) -0.5290(3) 0.0482(12) Uani 1 1 d . . . 

H53A H -0.6533 0.3722 -0.5414 0.072 Uiso 1 1 calc R . . 

H53B H -0.6786 0.2218 -0.5697 0.072 Uiso 1 1 calc R . . 

H53C H -0.5186 0.2920 -0.5279 0.072 Uiso 1 1 calc R . . 

C54 C -0.6567(5) 0.0488(4) -0.3195(2) 0.0368(9) Uani 1 1 d . . . 

H54A H -0.6076 -0.0057 -0.3579 0.055 Uiso 1 1 calc R . . 

H54B H -0.7523 0.0047 -0.3158 0.055 Uiso 1 1 calc R . . 

H54C H -0.5943 0.0698 -0.2675 0.055 Uiso 1 1 calc R . . 

Ni2 Ni -0.38328(4) -0.13530(4) 0.35207(3) 0.02505(12) Uani 1 1 d . . . 

Cl2 Cl -0.55701(12) -0.03217(11) 0.39346(7) 0.0513(3) Uani 1 1 d . . . 

B101 B -0.1490(5) -0.2841(4) 0.2817(2) 0.0258(9) Uani 1 1 d . . . 

H101 H -0.072(4) -0.340(4) 0.258(2) 0.032(11) Uiso 1 1 d . . . 

N101 N -0.1662(3) -0.0936(3) 0.38840(19) 0.0270(7) Uani 1 1 d . . . 

N102 N -0.0788(3) -0.1728(3) 0.35043(19) 0.0270(7) Uani 1 1 d . . . 

C103 C 0.0653(4) -0.1308(4) 0.3791(2) 0.0307(9) Uani 1 1 d . . . 

H10B H 0.1482 -0.1690 0.3622 0.037 Uiso 1 1 calc R . . 

C104 C 0.0701(4) -0.0220(4) 0.4377(2) 0.0340(9) Uani 1 1 d . . . 

H10C H 0.1561 0.0280 0.4689 0.041 Uiso 1 1 calc R . . 

C105 C -0.0769(4) -0.0009(3) 0.4418(2) 0.0285(8) Uani 1 1 d . . . 

C106 C -0.1361(4) 0.1075(3) 0.4898(2) 0.0283(8) Uani 1 1 d . . . 

C107 C -0.1541(5) 0.2130(4) 0.4587(3) 0.0389(10) Uani 1 1 d . . . 

C108 C -0.2078(5) 0.3167(4) 0.5044(3) 0.0449(11) Uani 1 1 d . . . 

H10D H -0.2203 0.3889 0.4836 0.054 Uiso 1 1 calc R . . 

C109 C -0.2432(5) 0.3160(4) 0.5792(3) 0.0411(10) Uani 1 1 d . . . 

C110 C -0.2229(4) 0.2110(4) 0.6080(2) 0.0385(10) Uani 1 1 d . . . 

H11A H -0.2485 0.2091 0.6587 0.046 Uiso 1 1 calc R . . 

C111 C -0.1663(4) 0.1067(4) 0.5662(2) 0.0312(8) Uani 1 1 d . . . 

C112 C -0.1186(7) 0.2171(5) 0.3776(3) 0.0653(16) Uani 1 1 d . . . 

H11B H -0.0831 0.1377 0.3539 0.098 Uiso 1 1 calc R . . 

H11C H -0.0416 0.2872 0.3821 0.098 Uiso 1 1 calc R . . 

H11D H -0.2079 0.2288 0.3441 0.098 Uiso 1 1 calc R . . 

C113 C -0.2980(6) 0.4293(5) 0.6277(3) 0.0574(14) Uani 1 1 d . . . 

H11E H -0.3046 0.4947 0.5975 0.086 Uiso 1 1 calc R . . 

H11F H -0.2289 0.4620 0.6771 0.086 Uiso 1 1 calc R . . 

H11G H -0.3960 0.4049 0.6400 0.086 Uiso 1 1 calc R . . 

C114 C -0.1319(5) 0.0001(4) 0.6042(3) 0.0448(11) Uani 1 1 d . . . 

H11H H -0.0935 -0.0647 0.5666 0.067 Uiso 1 1 calc R . . 

H11I H -0.2223 -0.0362 0.6192 0.067 Uiso 1 1 calc R . . 

H11J H -0.0574 0.0318 0.6515 0.067 Uiso 1 1 calc R . . 

N121 N -0.3733(3) -0.3182(3) 0.34916(18) 0.0272(7) Uani 1 1 d . . . 

N122 N -0.2604(3) -0.3689(3) 0.31398(18) 0.0263(6) Uani 1 1 d . . . 

C123 C -0.2721(4) -0.4931(3) 0.3116(2) 0.0300(8) Uani 1 1 d . . . 

H12D H -0.2072 -0.5495 0.2899 0.036 Uiso 1 1 calc R . . 

C124 C -0.3913(5) -0.5252(4) 0.3451(2) 0.0340(9) Uani 1 1 d . . . 

H12E H -0.4249 -0.6061 0.3518 0.041 Uiso 1 1 calc R . . 

C125 C -0.4542(4) -0.4121(3) 0.3677(2) 0.0263(8) Uani 1 1 d . . . 

C126 C -0.5888(4) -0.3933(3) 0.4053(2) 0.0276(8) Uani 1 1 d . . . 

C127 C -0.5787(4) -0.3141(4) 0.4829(2) 0.0308(9) Uani 1 1 d . . . 

C128 C -0.7065(5) -0.3000(4) 0.5167(2) 0.0355(9) Uani 1 1 d . . . 

H12F H -0.6996 -0.2474 0.5683 0.043 Uiso 1 1 calc R . . 

C129 C -0.8424(5) -0.3594(4) 0.4785(3) 0.0358(9) Uani 1 1 d . . . 

C130 C -0.8517(4) -0.4376(4) 0.4038(2) 0.0321(9) Uani 1 1 d . . . 

H13D H -0.9455 -0.4793 0.3770 0.038 Uiso 1 1 calc R . . 

C131 C -0.7275(4) -0.4565(3) 0.3672(2) 0.0275(8) Uani 1 1 d . . . 

C132 C -0.4313(5) -0.2462(5) 0.5278(3) 0.0471(11) Uani 1 1 d . . . 

H13E H -0.4458 -0.1965 0.5795 0.071 Uiso 1 1 calc R . . 

H13F H -0.3895 -0.1902 0.4974 0.071 Uiso 1 1 calc R . . 

H13G H -0.3632 -0.3081 0.5356 0.071 Uiso 1 1 calc R . . 

C133 C -0.9817(5) -0.3403(5) 0.5160(3) 0.0498(12) Uani 1 1 d . . . 

H13H H -0.9558 -0.2830 0.5685 0.075 Uiso 1 1 calc R . . 

H13I H -1.0278 -0.4216 0.5212 0.075 Uiso 1 1 calc R . . 

H13J H -1.0513 -0.3040 0.4824 0.075 Uiso 1 1 calc R . . 

C134 C -0.7452(5) -0.5439(4) 0.2861(3) 0.0413(11) Uani 1 1 d . . . 

H13K H -0.6485 -0.5474 0.2680 0.062 Uiso 1 1 calc R . . 

H13L H -0.8130 -0.5126 0.2488 0.062 Uiso 1 1 calc R . . 

H13M H -0.7854 -0.6285 0.2887 0.062 Uiso 1 1 calc R . . 

N141 N -0.3558(3) -0.1665(3) 0.23857(18) 0.0260(6) Uani 1 1 d . . . 

N142 N -0.2395(3) -0.2303(3) 0.21860(19) 0.0247(7) Uani 1 1 d . . . 

C143 C -0.2327(4) -0.2395(3) 0.1411(2) 0.0276(8) Uani 1 1 d . . . 

H14D H -0.1615 -0.2792 0.1127 0.033 Uiso 1 1 calc R . . 

C144 C -0.3458(4) -0.1818(4) 0.1101(2) 0.0314(8) Uani 1 1 d . . . 

H14E H -0.3681 -0.1740 0.0569 0.038 Uiso 1 1 calc R . . 

C145 C -0.4218(4) -0.1368(3) 0.1735(2) 0.0259(8) Uani 1 1 d . . . 

C146 C -0.5591(4) -0.0750(3) 0.1752(2) 0.0270(8) Uani 1 1 d . . . 

C147 C -0.5585(4) 0.0522(3) 0.1758(2) 0.0295(8) Uani 1 1 d . . . 

C148 C -0.6889(5) 0.1059(4) 0.1794(2) 0.0334(9) Uani 1 1 d . . . 

H14F H -0.6876 0.1926 0.1792 0.040 Uiso 1 1 calc R . . 

C149 C -0.8217(4) 0.0382(4) 0.1831(2) 0.0338(9) Uani 1 1 d . . . 

C150 C -0.8195(4) -0.0876(4) 0.1828(2) 0.0357(9) Uani 1 1 d . . . 

H15A H -0.9091 -0.1360 0.1853 0.043 Uiso 1 1 calc R . . 

C151 C -0.6923(4) -0.1463(4) 0.1791(2) 0.0309(8) Uani 1 1 d . . . 

C152 C -0.4186(5) 0.1328(4) 0.1700(3) 0.0462(11) Uani 1 1 d . . . 

H15B H -0.4403 0.2193 0.1716 0.069 Uiso 1 1 calc R . . 

H15C H -0.3833 0.0983 0.1201 0.069 Uiso 1 1 calc R . . 

H15D H -0.3421 0.1328 0.2147 0.069 Uiso 1 1 calc R . . 

C153 C -0.9618(5) 0.0975(5) 0.1881(3) 0.0498(12) Uani 1 1 d . . . 

H15E H -0.9424 0.1870 0.1883 0.075 Uiso 1 1 calc R . . 

H15F H -0.9991 0.0890 0.2369 0.075 Uiso 1 1 calc R . . 

H15G H -1.0359 0.0555 0.1422 0.075 Uiso 1 1 calc R . . 

C154 C -0.6964(5) -0.2830(4) 0.1826(3) 0.0465(11) Uani 1 1 d . . . 

H15H H -0.7978 -0.3167 0.1850 0.070 Uiso 1 1 calc R . . 

H15I H -0.6308 -0.2900 0.2299 0.070 Uiso 1 1 calc R . . 

H15J H -0.6632 -0.3310 0.1352 0.070 Uiso 1 1 calc R . . 

  

loop_ 

 _atom_site_aniso_label 

 _atom_site_aniso_U_11 

 _atom_site_aniso_U_22 

 _atom_site_aniso_U_33 

 _atom_site_aniso_U_23 

 _atom_site_aniso_U_13 

 _atom_site_aniso_U_12 

Ni1 0.0184(2) 0.0250(2) 0.0247(2) 0.00375(19) 0.00710(18) 0.00255(18) 

Cl1 0.0277(5) 0.0706(8) 0.0408(6) 0.0100(5) 0.0169(4) 0.0005(5) 

B1 0.021(2) 0.028(2) 0.030(2) 0.0037(17) 0.0071(16) 0.0015(16) 

N1 0.0171(14) 0.0264(16) 0.0281(16) 0.0041(13) 0.0053(12) 0.0007(12) 

N2 0.0192(16) 0.0304(17) 0.0260(17) 0.0050(14) 0.0052(13) 0.0024(13) 

C3 0.0259(19) 0.031(2) 0.0231(19) 0.0027(16) 0.0067(15) 0.0070(16) 

C4 0.029(2) 0.0274(19) 0.0237(18) -0.0005(15) 0.0032(15) 0.0042(15) 

C5 0.0207(17) 0.0242(18) 0.0274(18) 0.0060(15) 0.0029(14) 0.0043(14) 

C6 0.0243(18) 0.0185(17) 0.0290(19) -0.0010(14) 0.0035(14) 0.0006(14) 

C7 0.037(2) 0.0246(19) 0.034(2) 0.0075(16) 0.0021(17) -0.0012(16) 

C8 0.052(3) 0.035(2) 0.038(2) 0.014(2) 0.006(2) -0.006(2) 

C9 0.038(2) 0.049(3) 0.043(3) 0.003(2) 0.010(2) -0.016(2) 

C10 0.027(2) 0.037(2) 0.037(2) -0.0013(18) 0.0072(16) 0.0011(17) 

C11 0.0261(19) 0.0210(18) 0.031(2) -0.0008(15) 0.0017(15) 0.0007(15) 

C12 0.043(3) 0.040(2) 0.056(3) 0.022(2) 0.002(2) 0.009(2) 

C13 0.045(3) 0.096(5) 0.070(4) 0.015(3) 0.014(3) -0.031(3) 

C14 0.033(2) 0.038(2) 0.038(2) 0.0057(18) 0.0010(18) 0.0065(18) 

N21 0.0196(14) 0.0268(15) 0.0258(15) 0.0023(12) 0.0090(12) 0.0027(12) 

N22 0.0210(15) 0.0281(16) 0.0280(16) 0.0033(13) 0.0085(12) 0.0002(12) 

C23 0.0247(19) 0.035(2) 0.030(2) 0.0108(17) 0.0048(15) -0.0032(16) 

C24 0.0267(19) 0.0245(19) 0.036(2) 0.0090(16) 0.0027(16) 0.0022(15) 

C25 0.0248(18) 0.0197(17) 0.0263(19) 0.0010(14) -0.0004(14) 0.0005(14) 

C26 0.0258(19) 0.0241(18) 0.0299(19) 0.0098(15) 0.0061(15) 0.0048(15) 

C27 0.0297(19) 0.0272(19) 0.032(2) 0.0071(16) 0.0071(16) 0.0059(15) 

C28 0.027(2) 0.036(2) 0.047(2) 0.0168(19) 0.0108(18) 0.0066(17) 

C29 0.049(3) 0.040(2) 0.038(2) 0.0182(19) 0.021(2) 0.025(2) 

C30 0.045(3) 0.034(2) 0.028(2) 0.0026(18) 0.0092(18) 0.0133(19) 

C31 0.039(2) 0.0255(19) 0.028(2) 0.0072(16) 0.0045(16) 0.0029(16) 

C32 0.026(2) 0.041(2) 0.038(2) -0.0015(18) 0.0036(17) -0.0008(17) 

C33 0.058(3) 0.070(3) 0.063(3) 0.020(3) 0.036(3) 0.032(3) 

C34 0.045(3) 0.037(2) 0.034(2) -0.0019(18) -0.0042(19) 0.0010(19) 

N41 0.0201(15) 0.0284(16) 0.0272(16) 0.0051(13) 0.0070(12) 0.0043(13) 

N42 0.0197(15) 0.0303(17) 0.0287(17) 0.0011(14) 0.0078(13) 0.0012(13) 

C43 0.0188(19) 0.036(2) 0.043(2) 0.0066(19) 0.0067(16) 0.0019(17) 

C44 0.0228(19) 0.050(3) 0.033(2) 0.0077(19) 0.0008(16) 0.0049(18) 

C45 0.0236(18) 0.0231(18) 0.0298(19) 0.0017(15) 0.0021(15) 0.0019(14) 

C46 0.0237(18) 0.0225(18) 0.0277(19) 0.0013(15) -0.0029(14) -0.0015(14) 

C47 0.028(2) 0.030(2) 0.031(2) 0.0052(16) 0.0009(16) 0.0030(16) 

C48 0.040(2) 0.029(2) 0.039(2) 0.0139(17) 0.0040(18) 0.0060(17) 

C49 0.031(2) 0.037(2) 0.031(2) 0.0076(17) 0.0010(16) 0.0017(17) 

C50 0.031(2) 0.0298(19) 0.0242(19) -0.0006(15) 0.0011(15) 0.0030(16) 

C51 0.0239(18) 0.0260(18) 0.0270(19) 0.0042(15) -0.0008(14) 0.0007(15) 

C52 0.047(3) 0.033(2) 0.060(3) 0.011(2) 0.016(2) 0.010(2) 

C53 0.059(3) 0.049(3) 0.043(3) 0.021(2) 0.013(2) 0.008(2) 

C54 0.047(3) 0.028(2) 0.033(2) 0.0035(17) 0.0032(18) 0.0032(18) 

Ni2 0.0216(2) 0.0256(2) 0.0268(3) 0.0016(2) 0.00522(19) 0.00582(19) 

Cl2 0.0375(6) 0.0581(7) 0.0548(7) -0.0043(6) 0.0130(5) 0.0215(5) 

B101 0.028(2) 0.023(2) 0.026(2) 0.0016(17) 0.0057(17) 0.0084(17) 

N101 0.0236(16) 0.0277(17) 0.0289(17) 0.0028(14) 0.0043(13) 0.0070(13) 

N102 0.0203(15) 0.0305(17) 0.0273(17) -0.0009(14) 0.0044(13) 0.0055(13) 

C103 0.0204(19) 0.034(2) 0.037(2) 0.0062(18) 0.0048(16) 0.0065(16) 

C104 0.0212(19) 0.034(2) 0.041(2) 0.0006(18) -0.0016(16) 0.0017(16) 

C105 0.029(2) 0.0275(19) 0.0271(19) 0.0054(16) 0.0008(15) 0.0033(16) 

C106 0.0257(19) 0.0268(19) 0.0268(19) -0.0040(15) 0.0000(15) 0.0035(15) 

C107 0.043(2) 0.038(2) 0.034(2) 0.0034(18) 0.0058(18) 0.0106(19) 

C108 0.048(3) 0.028(2) 0.055(3) 0.002(2) 0.003(2) 0.0115(19) 

C109 0.034(2) 0.038(2) 0.042(3) -0.0064(19) -0.0005(18) 0.0087(18) 

C110 0.035(2) 0.048(3) 0.026(2) -0.0034(18) 0.0022(17) 0.0007(19) 

C111 0.0255(19) 0.033(2) 0.030(2) 0.0009(17) -0.0025(15) -0.0011(16) 

C112 0.107(5) 0.047(3) 0.054(3) 0.025(2) 0.025(3) 0.023(3) 

C113 0.052(3) 0.048(3) 0.060(3) -0.014(2) 0.004(2) 0.016(2) 

C114 0.056(3) 0.037(2) 0.039(2) 0.006(2) 0.004(2) 0.002(2) 

N121 0.0225(15) 0.0296(16) 0.0291(16) 0.0028(13) 0.0054(12) 0.0082(13) 

N122 0.0235(15) 0.0276(16) 0.0278(16) 0.0038(13) 0.0049(12) 0.0086(13) 

C123 0.031(2) 0.0233(19) 0.036(2) 0.0040(16) 0.0075(16) 0.0078(16) 

C124 0.038(2) 0.029(2) 0.038(2) 0.0077(17) 0.0108(18) 0.0070(17) 

C125 0.0297(19) 0.0223(18) 0.0254(19) 0.0050(15) 0.0005(15) 0.0016(15) 

C126 0.034(2) 0.0268(19) 0.027(2) 0.0096(16) 0.0125(16) 0.0089(16) 

C127 0.036(2) 0.030(2) 0.0234(19) 0.0019(16) 0.0015(16) 0.0002(17) 

C128 0.048(3) 0.035(2) 0.0231(19) 0.0036(16) 0.0096(18) 0.0092(19) 

C129 0.035(2) 0.038(2) 0.041(2) 0.0153(19) 0.0147(18) 0.0109(18) 

C130 0.0235(19) 0.034(2) 0.039(2) 0.0116(17) 0.0042(16) 0.0005(16) 

C131 0.031(2) 0.0232(18) 0.0284(19) 0.0053(15) 0.0036(15) 0.0046(15) 

C132 0.041(3) 0.062(3) 0.029(2) -0.002(2) -0.0016(19) -0.003(2) 

C133 0.042(3) 0.064(3) 0.051(3) 0.015(2) 0.024(2) 0.017(2) 

C134 0.037(2) 0.040(3) 0.040(2) -0.003(2) 0.0051(19) -0.0038(19) 

N141 0.0209(15) 0.0268(16) 0.0297(16) 0.0038(13) 0.0058(12) 0.0050(13) 

N142 0.0228(16) 0.0244(16) 0.0263(17) 0.0022(13) 0.0059(13) 0.0066(13) 

C143 0.026(2) 0.029(2) 0.0253(19) 0.0010(16) 0.0050(15) 0.0014(16) 

C144 0.032(2) 0.035(2) 0.0259(19) 0.0037(16) 0.0051(16) 0.0038(17) 

C145 0.0271(19) 0.0201(17) 0.0290(19) 0.0034(15) 0.0022(15) 0.0030(14) 

C146 0.030(2) 0.0269(19) 0.0235(18) 0.0039(15) 0.0030(14) 0.0042(15) 

C147 0.035(2) 0.0269(19) 0.0269(19) 0.0061(16) 0.0064(16) 0.0029(16) 

C148 0.043(2) 0.0262(19) 0.034(2) 0.0089(17) 0.0093(18) 0.0111(17) 

C149 0.030(2) 0.042(2) 0.028(2) 0.0037(17) 0.0031(16) 0.0125(17) 

C150 0.027(2) 0.041(2) 0.038(2) 0.0091(19) 0.0019(17) 0.0013(17) 

C151 0.026(2) 0.030(2) 0.033(2) 0.0049(16) -0.0015(16) 0.0049(16) 

C152 0.044(3) 0.031(2) 0.066(3) 0.013(2) 0.017(2) 0.0013(19) 

C153 0.042(3) 0.056(3) 0.052(3) 0.006(2) 0.008(2) 0.020(2) 

C154 0.033(2) 0.028(2) 0.074(3) 0.010(2) -0.001(2) 0.0017(18) 

  

_geom_special_details 

; 

 All esds (except the esd in the dihedral angle between two l.s. planes) 

 are estimated using the full covariance matrix.  The cell esds are taken 

 into account individually in the estimation of esds in distances, angles 

 and torsion angles; correlations between esds in cell parameters are only 

 used when they are defined by crystal symmetry.  An approximate (isotropic) 

 treatment of cell esds is used for estimating esds involving l.s. planes. 

; 

  

loop_ 

 _geom_bond_atom_site_label_1 

 _geom_bond_atom_site_label_2 

 _geom_bond_distance 

 _geom_bond_site_symmetry_2 

 _geom_bond_publ_flag 

Ni1 N41 1.990(3) . ? 

Ni1 N21 1.993(3) . ? 

Ni1 N1 2.004(3) . ? 

Ni1 Cl1 2.1473(10) . ? 

B1 N42 1.532(5) . ? 

B1 N22 1.541(5) . ? 

B1 N2 1.554(5) . ? 

N1 C5 1.349(5) . ? 

N1 N2 1.366(4) . ? 

N2 C3 1.336(5) . ? 

C3 C4 1.386(5) . ? 

C4 C5 1.399(5) . ? 

C5 C6 1.484(5) . ? 

C6 C7 1.393(5) . ? 

C6 C11 1.402(5) . ? 

C7 C8 1.380(6) . ? 

C7 C12 1.513(6) . ? 

C8 C9 1.397(7) . ? 

C9 C10 1.374(6) . ? 

C9 C13 1.518(6) . ? 

C10 C11 1.393(5) . ? 

C11 C14 1.500(6) . ? 

N21 C25 1.357(4) . ? 

N21 N22 1.366(4) . ? 

N22 C23 1.339(5) . ? 

C23 C24 1.382(5) . ? 

C24 C25 1.378(5) . ? 

C25 C26 1.489(5) . ? 

C26 C31 1.395(5) . ? 

C26 C27 1.399(5) . ? 

C27 C28 1.394(5) . ? 

C27 C32 1.503(5) . ? 

C28 C29 1.372(6) . ? 

C29 C30 1.389(6) . ? 

C29 C33 1.522(6) . ? 

C30 C31 1.394(6) . ? 

C31 C34 1.518(6) . ? 

N41 C45 1.341(5) . ? 

N41 N42 1.381(4) . ? 

N42 C43 1.336(5) . ? 

C43 C44 1.355(6) . ? 

C44 C45 1.399(5) . ? 

C45 C46 1.486(5) . ? 

C46 C47 1.411(5) . ? 

C46 C51 1.411(5) . ? 

C47 C48 1.380(6) . ? 

C47 C52 1.501(6) . ? 

C48 C49 1.381(6) . ? 

C49 C50 1.393(5) . ? 

C49 C53 1.515(6) . ? 

C50 C51 1.394(5) . ? 

C51 C54 1.511(5) . ? 

Ni2 N101 1.992(3) . ? 

Ni2 N141 1.993(3) . ? 

Ni2 N121 2.004(3) . ? 

Ni2 Cl2 2.1446(11) . ? 

B101 N102 1.540(5) . ? 

B101 N142 1.545(5) . ? 

B101 N122 1.561(5) . ? 

N101 C105 1.349(5) . ? 

N101 N102 1.358(4) . ? 

N102 C103 1.353(5) . ? 

C103 C104 1.385(6) . ? 

C104 C105 1.397(5) . ? 

C105 C106 1.485(5) . ? 

C106 C107 1.394(6) . ? 

C106 C111 1.400(5) . ? 

C107 C108 1.406(6) . ? 

C107 C112 1.505(7) . ? 

C108 C109 1.390(7) . ? 

C109 C110 1.371(6) . ? 

C109 C113 1.508(6) . ? 

C110 C111 1.396(6) . ? 

C111 C114 1.502(6) . ? 

N121 C125 1.338(5) . ? 

N121 N122 1.369(4) . ? 

N122 C123 1.346(5) . ? 

C123 C124 1.361(6) . ? 

C124 C125 1.412(5) . ? 

C125 C126 1.482(5) . ? 

C126 C131 1.403(5) . ? 

C126 C127 1.430(5) . ? 

C127 C128 1.385(6) . ? 

C127 C132 1.515(6) . ? 

C128 C129 1.371(6) . ? 

C129 C130 1.384(6) . ? 

C129 C133 1.521(6) . ? 

C130 C131 1.388(5) . ? 

C131 C134 1.510(6) . ? 

N141 C145 1.336(5) . ? 

N141 N142 1.367(4) . ? 

N142 C143 1.347(5) . ? 

C143 C144 1.375(5) . ? 

C144 C145 1.408(5) . ? 

C145 C146 1.482(5) . ? 

C146 C147 1.390(5) . ? 

C146 C151 1.410(5) . ? 

C147 C148 1.382(6) . ? 

C147 C152 1.520(6) . ? 

C148 C149 1.386(6) . ? 

C149 C150 1.379(6) . ? 

C149 C153 1.495(6) . ? 

C150 C151 1.383(5) . ? 

C151 C154 1.509(5) . ? 

  

loop_ 

 _geom_angle_atom_site_label_1 

 _geom_angle_atom_site_label_2 

 _geom_angle_atom_site_label_3 

 _geom_angle 

 _geom_angle_site_symmetry_1 

 _geom_angle_site_symmetry_3 

 _geom_angle_publ_flag 

N41 Ni1 N21 91.58(12) . . ? 

N41 Ni1 N1 92.86(12) . . ? 

N21 Ni1 N1 90.26(12) . . ? 

N41 Ni1 Cl1 128.81(10) . . ? 

N21 Ni1 Cl1 125.28(9) . . ? 

N1 Ni1 Cl1 117.89(9) . . ? 

N42 B1 N22 109.0(3) . . ? 

N42 B1 N2 108.0(3) . . ? 

N22 B1 N2 107.8(3) . . ? 

C5 N1 N2 107.4(3) . . ? 

C5 N1 Ni1 136.8(2) . . ? 

N2 N1 Ni1 115.8(2) . . ? 

C3 N2 N1 109.6(3) . . ? 

C3 N2 B1 131.5(3) . . ? 

N1 N2 B1 118.8(3) . . ? 

N2 C3 C4 108.5(3) . . ? 

C3 C4 C5 105.6(3) . . ? 

N1 C5 C4 108.8(3) . . ? 

N1 C5 C6 121.3(3) . . ? 

C4 C5 C6 129.9(3) . . ? 

C7 C6 C11 120.3(3) . . ? 

C7 C6 C5 120.1(3) . . ? 

C11 C6 C5 119.5(3) . . ? 

C8 C7 C6 119.4(4) . . ? 

C8 C7 C12 119.0(4) . . ? 

C6 C7 C12 121.6(4) . . ? 

C7 C8 C9 121.3(4) . . ? 

C10 C9 C8 118.6(4) . . ? 

C10 C9 C13 120.2(5) . . ? 

C8 C9 C13 121.3(5) . . ? 

C9 C10 C11 121.9(4) . . ? 

C10 C11 C6 118.5(4) . . ? 

C10 C11 C14 119.3(3) . . ? 

C6 C11 C14 122.2(3) . . ? 

C25 N21 N22 106.9(3) . . ? 

C25 N21 Ni1 137.5(2) . . ? 

N22 N21 Ni1 115.5(2) . . ? 

C23 N22 N21 109.3(3) . . ? 

C23 N22 B1 131.2(3) . . ? 

N21 N22 B1 119.5(3) . . ? 

N22 C23 C24 108.6(3) . . ? 

C25 C24 C23 105.9(3) . . ? 

N21 C25 C24 109.3(3) . . ? 

N21 C25 C26 121.0(3) . . ? 

C24 C25 C26 129.6(3) . . ? 

C31 C26 C27 119.6(3) . . ? 

C31 C26 C25 120.6(3) . . ? 

C27 C26 C25 119.7(3) . . ? 

C28 C27 C26 119.2(4) . . ? 

C28 C27 C32 119.2(4) . . ? 

C26 C27 C32 121.7(3) . . ? 

C29 C28 C27 121.9(4) . . ? 

C28 C29 C30 118.6(4) . . ? 

C28 C29 C33 120.7(4) . . ? 

C30 C29 C33 120.7(4) . . ? 

C29 C30 C31 121.2(4) . . ? 

C30 C31 C26 119.5(4) . . ? 

C30 C31 C34 119.2(4) . . ? 

C26 C31 C34 121.3(4) . . ? 

C45 N41 N42 106.7(3) . . ? 

C45 N41 Ni1 138.5(3) . . ? 

N42 N41 Ni1 114.8(2) . . ? 

C43 N42 N41 109.0(3) . . ? 

C43 N42 B1 131.0(3) . . ? 

N41 N42 B1 119.9(3) . . ? 

N42 C43 C44 109.2(4) . . ? 

C43 C44 C45 106.1(4) . . ? 

N41 C45 C44 109.0(3) . . ? 

N41 C45 C46 123.8(3) . . ? 

C44 C45 C46 127.2(3) . . ? 

C47 C46 C51 119.3(3) . . ? 

C47 C46 C45 119.3(3) . . ? 

C51 C46 C45 121.2(3) . . ? 

C48 C47 C46 118.8(4) . . ? 

C48 C47 C52 119.1(4) . . ? 

C46 C47 C52 122.0(4) . . ? 

C47 C48 C49 123.0(4) . . ? 

C48 C49 C50 118.0(4) . . ? 

C48 C49 C53 121.4(4) . . ? 

C50 C49 C53 120.6(4) . . ? 

C49 C50 C51 121.4(4) . . ? 

C50 C51 C46 119.4(3) . . ? 

C50 C51 C54 118.3(3) . . ? 

C46 C51 C54 122.3(3) . . ? 

N101 Ni2 N141 91.88(13) . . ? 

N101 Ni2 N121 91.87(13) . . ? 

N141 Ni2 N121 89.86(13) . . ? 

N101 Ni2 Cl2 127.77(10) . . ? 

N141 Ni2 Cl2 120.81(9) . . ? 

N121 Ni2 Cl2 124.37(10) . . ? 

N102 B101 N142 107.8(3) . . ? 

N102 B101 N122 108.1(3) . . ? 

N142 B101 N122 107.3(3) . . ? 

C105 N101 N102 107.7(3) . . ? 

C105 N101 Ni2 136.2(3) . . ? 

N102 N101 Ni2 116.1(2) . . ? 

C103 N102 N101 109.7(3) . . ? 

C103 N102 B101 130.3(3) . . ? 

N101 N102 B101 119.9(3) . . ? 

N102 C103 C104 107.7(3) . . ? 

C103 C104 C105 106.1(3) . . ? 

N101 C105 C104 108.8(3) . . ? 

N101 C105 C106 121.9(3) . . ? 

C104 C105 C106 129.1(3) . . ? 

C107 C106 C111 120.5(4) . . ? 

C107 C106 C105 118.4(3) . . ? 

C111 C106 C105 121.0(3) . . ? 

C106 C107 C108 118.7(4) . . ? 

C106 C107 C112 121.4(4) . . ? 

C108 C107 C112 119.9(4) . . ? 

C109 C108 C107 121.6(4) . . ? 

C110 C109 C108 118.0(4) . . ? 

C110 C109 C113 121.3(4) . . ? 

C108 C109 C113 120.6(4) . . ? 

C109 C110 C111 122.8(4) . . ? 

C110 C111 C106 118.3(4) . . ? 

C110 C111 C114 120.3(4) . . ? 

C106 C111 C114 121.3(4) . . ? 

C125 N121 N122 107.2(3) . . ? 

C125 N121 Ni2 137.5(3) . . ? 

N122 N121 Ni2 115.1(2) . . ? 

C123 N122 N121 108.9(3) . . ? 

C123 N122 B101 131.1(3) . . ? 

N121 N122 B101 120.0(3) . . ? 

N122 C123 C124 109.5(3) . . ? 

C123 C124 C125 105.1(3) . . ? 

N121 C125 C124 109.3(3) . . ? 

N121 C125 C126 122.6(3) . . ? 

C124 C125 C126 128.0(3) . . ? 

C131 C126 C127 118.5(3) . . ? 

C131 C126 C125 121.0(3) . . ? 

C127 C126 C125 120.4(3) . . ? 

C128 C127 C126 118.9(4) . . ? 

C128 C127 C132 120.2(4) . . ? 

C126 C127 C132 120.9(4) . . ? 

C129 C128 C127 122.3(4) . . ? 

C128 C129 C130 118.7(4) . . ? 

C128 C129 C133 121.4(4) . . ? 

C130 C129 C133 119.9(4) . . ? 

C129 C130 C131 121.6(4) . . ? 

C130 C131 C126 119.8(3) . . ? 

C130 C131 C134 118.9(4) . . ? 

C126 C131 C134 121.2(3) . . ? 

C145 N141 N142 107.9(3) . . ? 

C145 N141 Ni2 135.8(2) . . ? 

N142 N141 Ni2 116.3(2) . . ? 

C143 N142 N141 109.0(3) . . ? 

C143 N142 B101 131.8(3) . . ? 

N141 N142 B101 119.0(3) . . ? 

N142 C143 C144 108.7(3) . . ? 

C143 C144 C145 105.6(3) . . ? 

N141 C145 C144 108.8(3) . . ? 

N141 C145 C146 120.5(3) . . ? 

C144 C145 C146 130.5(3) . . ? 

C147 C146 C151 119.5(3) . . ? 

C147 C146 C145 121.7(3) . . ? 

C151 C146 C145 118.8(3) . . ? 

C148 C147 C146 119.3(4) . . ? 

C148 C147 C152 119.1(4) . . ? 

C146 C147 C152 121.6(4) . . ? 

C147 C148 C149 122.6(4) . . ? 

C150 C149 C148 117.0(4) . . ? 

C150 C149 C153 120.7(4) . . ? 

C148 C149 C153 122.2(4) . . ? 

C149 C150 C151 122.8(4) . . ? 

C150 C151 C146 118.8(4) . . ? 

C150 C151 C154 120.0(4) . . ? 

C146 C151 C154 121.2(3) . . ? 

  

loop_ 

 _geom_torsion_atom_site_label_1 

 _geom_torsion_atom_site_label_2 

 _geom_torsion_atom_site_label_3 

 _geom_torsion_atom_site_label_4 

 _geom_torsion 

 _geom_torsion_site_symmetry_1 

 _geom_torsion_site_symmetry_2 

 _geom_torsion_site_symmetry_3 

 _geom_torsion_site_symmetry_4 

 _geom_torsion_publ_flag 

N41 Ni1 N1 C5 -136.3(4) . . . . ? 

N21 Ni1 N1 C5 132.1(4) . . . . ? 

Cl1 Ni1 N1 C5 1.2(4) . . . . ? 

N41 Ni1 N1 N2 43.6(3) . . . . ? 

N21 Ni1 N1 N2 -48.0(3) . . . . ? 

Cl1 Ni1 N1 N2 -179.0(2) . . . . ? 

C5 N1 N2 C3 -0.5(4) . . . . ? 

Ni1 N1 N2 C3 179.6(2) . . . . ? 

C5 N1 N2 B1 -178.0(3) . . . . ? 

Ni1 N1 N2 B1 2.1(4) . . . . ? 

N42 B1 N2 C3 123.1(4) . . . . ? 

N22 B1 N2 C3 -119.3(4) . . . . ? 

N42 B1 N2 N1 -60.0(4) . . . . ? 

N22 B1 N2 N1 57.5(4) . . . . ? 

N1 N2 C3 C4 0.6(4) . . . . ? 

B1 N2 C3 C4 177.6(4) . . . . ? 

N2 C3 C4 C5 -0.4(4) . . . . ? 

N2 N1 C5 C4 0.3(4) . . . . ? 

Ni1 N1 C5 C4 -179.9(3) . . . . ? 

N2 N1 C5 C6 -179.2(3) . . . . ? 

Ni1 N1 C5 C6 0.7(6) . . . . ? 

C3 C4 C5 N1 0.1(4) . . . . ? 

C3 C4 C5 C6 179.5(3) . . . . ? 

N1 C5 C6 C7 71.9(5) . . . . ? 

C4 C5 C6 C7 -107.5(5) . . . . ? 

N1 C5 C6 C11 -110.4(4) . . . . ? 

C4 C5 C6 C11 70.3(5) . . . . ? 

C11 C6 C7 C8 0.8(6) . . . . ? 

C5 C6 C7 C8 178.5(4) . . . . ? 

C11 C6 C7 C12 179.8(4) . . . . ? 

C5 C6 C7 C12 -2.4(6) . . . . ? 

C6 C7 C8 C9 0.7(7) . . . . ? 

C12 C7 C8 C9 -178.4(4) . . . . ? 

C7 C8 C9 C10 -1.0(7) . . . . ? 

C7 C8 C9 C13 178.7(5) . . . . ? 

C8 C9 C10 C11 -0.1(6) . . . . ? 

C13 C9 C10 C11 -179.8(4) . . . . ? 

C9 C10 C11 C6 1.5(6) . . . . ? 

C9 C10 C11 C14 -179.1(4) . . . . ? 

C7 C6 C11 C10 -1.8(5) . . . . ? 

C5 C6 C11 C10 -179.6(3) . . . . ? 

C7 C6 C11 C14 178.7(3) . . . . ? 

C5 C6 C11 C14 1.0(5) . . . . ? 

N41 Ni1 N21 C25 134.3(4) . . . . ? 

N1 Ni1 N21 C25 -132.8(4) . . . . ? 

Cl1 Ni1 N21 C25 -7.6(4) . . . . ? 

N41 Ni1 N21 N22 -45.6(2) . . . . ? 

N1 Ni1 N21 N22 47.3(2) . . . . ? 

Cl1 Ni1 N21 N22 172.45(19) . . . . ? 

C25 N21 N22 C23 -0.3(4) . . . . ? 

Ni1 N21 N22 C23 179.7(2) . . . . ? 

C25 N21 N22 B1 179.3(3) . . . . ? 

Ni1 N21 N22 B1 -0.7(4) . . . . ? 

N42 B1 N22 C23 -122.2(4) . . . . ? 

N2 B1 N22 C23 120.9(4) . . . . ? 

N42 B1 N22 N21 58.3(4) . . . . ? 

N2 B1 N22 N21 -58.6(4) . . . . ? 

N21 N22 C23 C24 -0.2(4) . . . . ? 

B1 N22 C23 C24 -179.8(3) . . . . ? 

N22 C23 C24 C25 0.6(4) . . . . ? 

N22 N21 C25 C24 0.7(4) . . . . ? 

Ni1 N21 C25 C24 -179.2(3) . . . . ? 

N22 N21 C25 C26 -176.3(3) . . . . ? 

Ni1 N21 C25 C26 3.8(6) . . . . ? 

C23 C24 C25 N21 -0.8(4) . . . . ? 

C23 C24 C25 C26 175.8(4) . . . . ? 

N21 C25 C26 C31 -112.5(4) . . . . ? 

C24 C25 C26 C31 71.2(5) . . . . ? 

N21 C25 C26 C27 70.8(5) . . . . ? 

C24 C25 C26 C27 -105.5(5) . . . . ? 

C31 C26 C27 C28 0.8(5) . . . . ? 

C25 C26 C27 C28 177.6(3) . . . . ? 

C31 C26 C27 C32 -179.4(4) . . . . ? 

C25 C26 C27 C32 -2.7(5) . . . . ? 

C26 C27 C28 C29 -0.7(6) . . . . ? 

C32 C27 C28 C29 179.6(4) . . . . ? 

C27 C28 C29 C30 0.6(6) . . . . ? 

C27 C28 C29 C33 179.3(4) . . . . ? 

C28 C29 C30 C31 -0.7(6) . . . . ? 

C33 C29 C30 C31 -179.4(4) . . . . ? 

C29 C30 C31 C26 1.0(6) . . . . ? 

C29 C30 C31 C34 -177.8(4) . . . . ? 

C27 C26 C31 C30 -1.0(5) . . . . ? 

C25 C26 C31 C30 -177.7(3) . . . . ? 

C27 C26 C31 C34 177.7(4) . . . . ? 

C25 C26 C31 C34 1.0(5) . . . . ? 

N21 Ni1 N41 C45 -132.2(4) . . . . ? 

N1 Ni1 N41 C45 137.5(4) . . . . ? 

Cl1 Ni1 N41 C45 7.6(4) . . . . ? 

N21 Ni1 N41 N42 47.5(2) . . . . ? 

N1 Ni1 N41 N42 -42.8(2) . . . . ? 

Cl1 Ni1 N41 N42 -172.69(19) . . . . ? 

C45 N41 N42 C43 -0.5(4) . . . . ? 

Ni1 N41 N42 C43 179.7(3) . . . . ? 

C45 N41 N42 B1 176.5(3) . . . . ? 

Ni1 N41 N42 B1 -3.3(4) . . . . ? 

N22 B1 N42 C43 120.6(4) . . . . ? 

N2 B1 N42 C43 -122.7(4) . . . . ? 

N22 B1 N42 N41 -55.7(4) . . . . ? 

N2 B1 N42 N41 61.1(4) . . . . ? 

N41 N42 C43 C44 0.1(5) . . . . ? 

B1 N42 C43 C44 -176.5(4) . . . . ? 

N42 C43 C44 C45 0.4(5) . . . . ? 

N42 N41 C45 C44 0.8(4) . . . . ? 

Ni1 N41 C45 C44 -179.5(3) . . . . ? 

N42 N41 C45 C46 -178.6(3) . . . . ? 

Ni1 N41 C45 C46 1.1(6) . . . . ? 

C43 C44 C45 N41 -0.7(5) . . . . ? 

C43 C44 C45 C46 178.6(4) . . . . ? 

N41 C45 C46 C47 -126.0(4) . . . . ? 

C44 C45 C46 C47 54.9(5) . . . . ? 

N41 C45 C46 C51 59.0(5) . . . . ? 

C44 C45 C46 C51 -120.1(4) . . . . ? 

C51 C46 C47 C48 -0.5(5) . . . . ? 

C45 C46 C47 C48 -175.6(3) . . . . ? 

C51 C46 C47 C52 178.7(4) . . . . ? 

C45 C46 C47 C52 3.6(5) . . . . ? 

C46 C47 C48 C49 -0.1(6) . . . . ? 

C52 C47 C48 C49 -179.3(4) . . . . ? 

C47 C48 C49 C50 -0.7(6) . . . . ? 

C47 C48 C49 C53 177.7(4) . . . . ? 

C48 C49 C50 C51 2.1(6) . . . . ? 

C53 C49 C50 C51 -176.3(4) . . . . ? 

C49 C50 C51 C46 -2.8(5) . . . . ? 

C49 C50 C51 C54 175.9(3) . . . . ? 

C47 C46 C51 C50 1.9(5) . . . . ? 

C45 C46 C51 C50 176.9(3) . . . . ? 

C47 C46 C51 C54 -176.8(3) . . . . ? 

C45 C46 C51 C54 -1.8(5) . . . . ? 

N141 Ni2 N101 C105 131.8(4) . . . . ? 

N121 Ni2 N101 C105 -138.3(4) . . . . ? 

Cl2 Ni2 N101 C105 -0.5(4) . . . . ? 

N141 Ni2 N101 N102 -45.5(3) . . . . ? 

N121 Ni2 N101 N102 44.4(3) . . . . ? 

Cl2 Ni2 N101 N102 -177.9(2) . . . . ? 

C105 N101 N102 C103 -0.2(4) . . . . ? 

Ni2 N101 N102 C103 177.9(3) . . . . ? 

C105 N101 N102 B101 -176.0(3) . . . . ? 

Ni2 N101 N102 B101 2.0(4) . . . . ? 

N142 B101 N102 C103 -118.0(4) . . . . ? 

N122 B101 N102 C103 126.3(4) . . . . ? 

N142 B101 N102 N101 56.9(4) . . . . ? 

N122 B101 N102 N101 -58.9(4) . . . . ? 

N101 N102 C103 C104 0.5(5) . . . . ? 

B101 N102 C103 C104 175.8(4) . . . . ? 

N102 C103 C104 C105 -0.7(5) . . . . ? 

N102 N101 C105 C104 -0.2(4) . . . . ? 

Ni2 N101 C105 C104 -177.7(3) . . . . ? 

N102 N101 C105 C106 175.5(3) . . . . ? 

Ni2 N101 C105 C106 -2.0(6) . . . . ? 

C103 C104 C105 N101 0.6(5) . . . . ? 

C103 C104 C105 C106 -174.8(4) . . . . ? 

N101 C105 C106 C107 -88.1(5) . . . . ? 

C104 C105 C106 C107 86.7(5) . . . . ? 

N101 C105 C106 C111 95.1(5) . . . . ? 

C104 C105 C106 C111 -90.2(5) . . . . ? 

C111 C106 C107 C108 -2.2(6) . . . . ? 

C105 C106 C107 C108 -179.0(4) . . . . ? 

C111 C106 C107 C112 178.4(4) . . . . ? 

C105 C106 C107 C112 1.6(6) . . . . ? 

C106 C107 C108 C109 -0.1(7) . . . . ? 

C112 C107 C108 C109 179.3(5) . . . . ? 

C107 C108 C109 C110 0.6(7) . . . . ? 

C107 C108 C109 C113 178.8(4) . . . . ? 

C108 C109 C110 C111 1.1(6) . . . . ? 

C113 C109 C110 C111 -177.1(4) . . . . ? 

C109 C110 C111 C106 -3.3(6) . . . . ? 

C109 C110 C111 C114 173.7(4) . . . . ? 

C107 C106 C111 C110 3.7(6) . . . . ? 

C105 C106 C111 C110 -179.5(3) . . . . ? 

C107 C106 C111 C114 -173.2(4) . . . . ? 

C105 C106 C111 C114 3.6(6) . . . . ? 

N101 Ni2 N121 C125 140.2(4) . . . . ? 

N141 Ni2 N121 C125 -128.0(4) . . . . ? 

Cl2 Ni2 N121 C125 0.3(4) . . . . ? 

N101 Ni2 N121 N122 -45.8(2) . . . . ? 

N141 Ni2 N121 N122 46.1(2) . . . . ? 

Cl2 Ni2 N121 N122 174.35(19) . . . . ? 

C125 N121 N122 C123 -0.4(4) . . . . ? 

Ni2 N121 N122 C123 -176.2(2) . . . . ? 

C125 N121 N122 B101 177.3(3) . . . . ? 

Ni2 N121 N122 B101 1.5(4) . . . . ? 

N102 B101 N122 C123 -126.3(4) . . . . ? 

N142 B101 N122 C123 117.6(4) . . . . ? 

N102 B101 N122 N121 56.6(4) . . . . ? 

N142 B101 N122 N121 -59.5(4) . . . . ? 

N121 N122 C123 C124 -0.2(4) . . . . ? 

B101 N122 C123 C124 -177.6(4) . . . . ? 

N122 C123 C124 C125 0.7(4) . . . . ? 

N122 N121 C125 C124 0.8(4) . . . . ? 

Ni2 N121 C125 C124 175.2(3) . . . . ? 

N122 N121 C125 C126 -178.5(3) . . . . ? 

Ni2 N121 C125 C126 -4.1(6) . . . . ? 

C123 C124 C125 N121 -0.9(4) . . . . ? 

C123 C124 C125 C126 178.4(4) . . . . ? 

N121 C125 C126 C131 118.6(4) . . . . ? 

C124 C125 C126 C131 -60.6(5) . . . . ? 

N121 C125 C126 C127 -64.0(5) . . . . ? 

C124 C125 C126 C127 116.8(4) . . . . ? 

C131 C126 C127 C128 -1.6(5) . . . . ? 

C125 C126 C127 C128 -179.0(4) . . . . ? 

C131 C126 C127 C132 178.3(4) . . . . ? 

C125 C126 C127 C132 0.9(6) . . . . ? 

C126 C127 C128 C129 0.0(6) . . . . ? 

C132 C127 C128 C129 180.0(4) . . . . ? 

C127 C128 C129 C130 1.0(6) . . . . ? 

C127 C128 C129 C133 -178.6(4) . . . . ? 

C128 C129 C130 C131 -0.2(6) . . . . ? 

C133 C129 C130 C131 179.3(4) . . . . ? 

C129 C130 C131 C126 -1.5(6) . . . . ? 

C129 C130 C131 C134 179.4(4) . . . . ? 

C127 C126 C131 C130 2.4(5) . . . . ? 

C125 C126 C131 C130 179.8(3) . . . . ? 

C127 C126 C131 C134 -178.5(4) . . . . ? 

C125 C126 C131 C134 -1.2(6) . . . . ? 

N101 Ni2 N141 C145 -136.3(4) . . . . ? 

N121 Ni2 N141 C145 131.9(4) . . . . ? 

Cl2 Ni2 N141 C145 0.9(4) . . . . ? 

N101 Ni2 N141 N142 41.2(3) . . . . ? 

N121 Ni2 N141 N142 -50.7(3) . . . . ? 

Cl2 Ni2 N141 N142 178.3(2) . . . . ? 

C145 N141 N142 C143 0.4(4) . . . . ? 

Ni2 N141 N142 C143 -177.7(2) . . . . ? 

C145 N141 N142 B101 -176.0(3) . . . . ? 

Ni2 N141 N142 B101 5.9(4) . . . . ? 

N102 B101 N142 C143 122.9(4) . . . . ? 

N122 B101 N142 C143 -120.9(4) . . . . ? 

N102 B101 N142 N141 -61.6(4) . . . . ? 

N122 B101 N142 N141 54.6(4) . . . . ? 

N141 N142 C143 C144 -0.3(4) . . . . ? 

B101 N142 C143 C144 175.5(4) . . . . ? 

N142 C143 C144 C145 0.1(4) . . . . ? 

N142 N141 C145 C144 -0.4(4) . . . . ? 

Ni2 N141 C145 C144 177.2(3) . . . . ? 

N142 N141 C145 C146 175.5(3) . . . . ? 

Ni2 N141 C145 C146 -6.9(5) . . . . ? 

C143 C144 C145 N141 0.2(4) . . . . ? 

C143 C144 C145 C146 -175.2(4) . . . . ? 

N141 C145 C146 C147 105.4(4) . . . . ? 

C144 C145 C146 C147 -79.7(5) . . . . ? 

N141 C145 C146 C151 -72.3(5) . . . . ? 

C144 C145 C146 C151 102.6(5) . . . . ? 

C151 C146 C147 C148 -0.7(6) . . . . ? 

C145 C146 C147 C148 -178.4(4) . . . . ? 

C151 C146 C147 C152 -178.8(4) . . . . ? 

C145 C146 C147 C152 3.5(6) . . . . ? 

C146 C147 C148 C149 0.6(6) . . . . ? 

C152 C147 C148 C149 178.7(4) . . . . ? 

C147 C148 C149 C150 -0.3(6) . . . . ? 

C147 C148 C149 C153 179.2(4) . . . . ? 

C148 C149 C150 C151 0.1(6) . . . . ? 

C153 C149 C150 C151 -179.4(4) . . . . ? 

C149 C150 C151 C146 -0.2(6) . . . . ? 

C149 C150 C151 C154 177.3(4) . . . . ? 

C147 C146 C151 C150 0.5(6) . . . . ? 

C145 C146 C151 C150 178.3(3) . . . . ? 

C147 C146 C151 C154 -177.0(4) . . . . ? 

C145 C146 C151 C154 0.8(6) . . . . ? 

  

_diffrn_measured_fraction_theta_max    0.994 

_diffrn_reflns_theta_full              26.00 

_diffrn_measured_fraction_theta_full   0.994 

_refine_diff_density_max    0.473 

_refine_diff_density_min   -0.289 

_refine_diff_density_rms    0.058 

  

         
#===END
